# Supplementary material for: Mild deuteration method of terminal alkynes in heavy water using reusable basic resin
Source: Royal Society of Chemistry journal article supplement (doi:10.1039/c5ra18921g), 2015-01-01

Supporting Information

**Mild Deuteration Method of Terminal Alkynes  
in Heavy Water using Reusable Basic Resin**

Tsuyoshi Yamada, Kwihwan Park, Yasunari Monguchi,  
Yoshinari Sawama\* and Hironao Sajiki\*

Laboratory of Organic Chemistry, Gifu Pharmaceutical University, 1-25-4  
Daigaku-nishi, Gifu 501-1196, Japan

Contents

1. General
2. Effect of co-solvent in deuteration of 4-phenylethynylbenzene (**1b**)
3. Reuse study of WA30 under D<sub>2</sub>O-toluene mixed solvent conditions
4. Effect of co-solvent in deuteration of **1m**
5. Typical procedures for the deuteration of terminal alkynes
6. Reuse test of WA30
7. Spectroscopic data of deuterated terminal alkynes
8. Reference
9. <sup>1</sup>H and <sup>2</sup>H NMR spectra of deuterated terminal alkynes

**1. General**

DIAION WA30 was obtained from Mitsubishi Chemical Corporation, Japan. D<sub>2</sub>O (>99.8% D atom) was purchased from Kanto Chemical Co., Inc. <sup>1</sup>H and <sup>2</sup>H NMR spectra were recorded by a JEOL AL-400, EX-400 (<sup>1</sup>H: 400 MHz) or ECA-500 spectrometer (<sup>1</sup>H: 500 MHz, <sup>2</sup>H: 61 MHz). Chemical shifts (δ) are expressed in ppm and are internally referenced (7.26 ppm for CDCl<sub>3</sub> for <sup>1</sup>H and <sup>2</sup>H NMR, 0.00 ppm for tetramethylsilane for <sup>1</sup>H NMR or 3.31 ppm for CD<sub>3</sub>OD-*d*<sub>4</sub> for <sup>1</sup>H NMR). The deuterium content was also assigned by the <sup>2</sup>H NMR. Flash column chromatography was performed with Silica Gel 60 N (Kanto Chemical Co., Inc., 63–210 μm spherical, neutral). Substrates (**1a-e** and **1g-m**) were purchasable and used without further purification. The substrate (**1f**) was prepared according to the reference 1.

## 2. Effect of co-solvent in deuteration of 4-phenylethynylbenzene (**1b**)

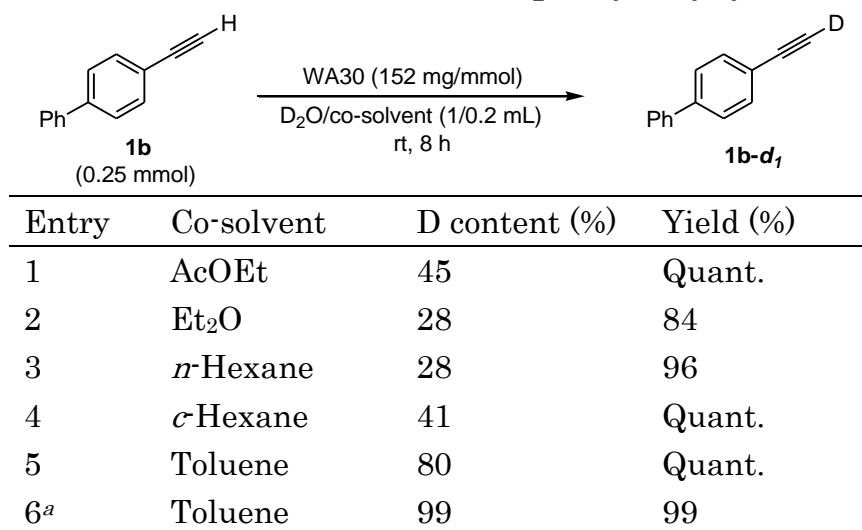

<sup>a</sup>For 12 h.

## 3. Reuse test of WA30 in D<sub>2</sub>O-toluene mixed solvent

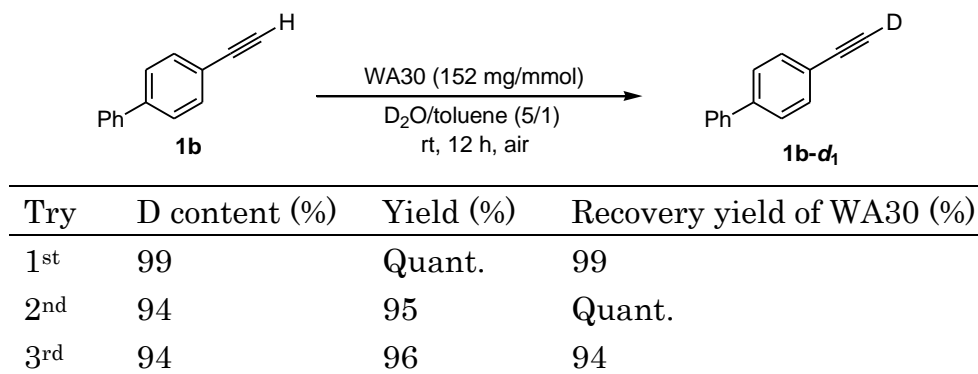

## 4. Effect of co-solvent in deuteration of **1m**

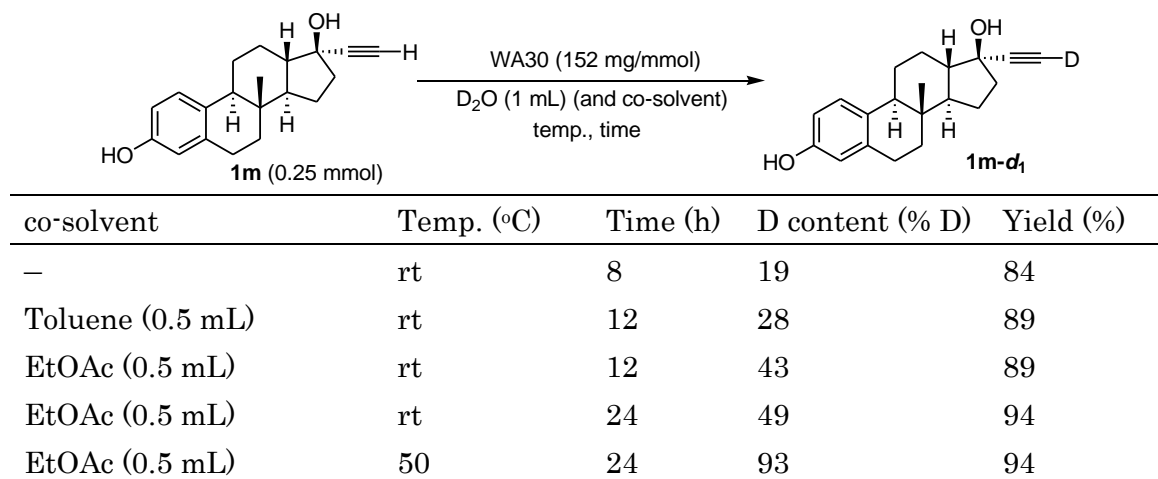

## 5. Procedures for deuteration of terminal alkynes

### 5-1. Typical procedure for deuteration of terminal alkynes in D<sub>2</sub>O

A suspension of WA30 (38 mg) and an alkyne (0.25 mmol) in D<sub>2</sub>O (1 mL) in a round bottom flask was stirred at room temperature or 50 °C under atmospheric conditions. After stirring for adequate time, the reaction mixture was filtrated to remove WA30. The filtrate was extracted with Et<sub>2</sub>O (10 mL) and H<sub>2</sub>O (5 mL), and then the aqueous layer was further extracted with Et<sub>2</sub>O (10 mL x 3). The combined organic layers were dried over anhydrous MgSO<sub>4</sub>, filtrated and concentrated in vacuo to give the deuterated alkyne (alkyne-*d*<sub>1</sub>).

### 5-2. Typical Procedure for deuteration of terminal alkynes in D<sub>2</sub>O-toluene mixed solvent

A suspension of WA30 (38 mg) and an alkyne (0.25 mmol) in D<sub>2</sub>O (1 mL) and toluene (0.2 mL) in a round bottom flask was stirred at room temperature under atmospheric conditions. After stirring for adequate time, the reaction mixture was filtrated to remove WA30. The filtrate was extracted with Et<sub>2</sub>O (10 mL) and H<sub>2</sub>O (5 mL), and then the aqueous layer was further extracted with Et<sub>2</sub>O (10 mL x 3). The combined organic layers were dried over anhydrous MgSO<sub>4</sub>, filtrated and concentrated in vacuo to give the deuterated alkyne (alkyne-*d*<sub>1</sub>).

## 6. Reuse test of WA30 in D<sub>2</sub>O (Tabl 3)

A suspension of WA30 (152 mg) and **1a** (1.00 mmol) in D<sub>2</sub>O (4 mL) in a round bottom flask was stirred at room temperature under atmospheric conditions. After stirring for 8 h, the mixture was filtrated to collect WA30. The filtrate was extracted with Et<sub>2</sub>O (20 mL) and H<sub>2</sub>O (10 mL), and then the aqueous layer was further extracted with Et<sub>2</sub>O (20 mL x 3). The combined organic layers were dried over anhydrous MgSO<sub>4</sub>, filtrated and concentrated in vacuo to give deuterated alkyne (**1a-d**<sub>1</sub>). The collected WA30 was washed with H<sub>2</sub>O (20 mL) and Et<sub>2</sub>O (20 mL) and dried in vacuo for 24 h. The recovered WA30 was reused in the next reaction.

## 7. Spectroscopic data of deuterated terminal alkynes

**1-(Ethynyl-2-*d*)-4-methoxybenzene (1a-*d*<sub>1</sub>; Table 1, entry 1)** : **1a-d**<sub>1</sub> (31.1 mg, 233 μmol) was obtained in 93% as a colorless oil, <sup>1</sup>H NMR (400 MHz, CDCl<sub>3</sub>): δ 7.44 (d, *J* = 9.2 Hz, 2H), 6.85 (d, *J* = 9.2 Hz, 2H), 3.81 (s, 3H), 3.00 (s, 0.01H); <sup>2</sup>H NMR (61 MHz,

CHCl<sub>3</sub>):  $\delta$  3.01 (s).

**1-(Ethynyl-2-*d*)-4-phenylbenzene (1b-*d*<sub>1</sub>; eq. 1) :** **1b-*d*<sub>1</sub>** (44.5 mg, 248  $\mu$ mol) was obtained in 99% as a colorless solid, <sup>1</sup>H NMR (400 MHz, CDCl<sub>3</sub>):  $\delta$  7.58–7.53 (m, 6H), 7.43 (t, *J* = 7.2 Hz, 2H), 7.35 (t, *J* = 7.0 Hz, 1H) 3.12 (s, 0.01H); <sup>2</sup>H NMR (61 MHz, CHCl<sub>3</sub>):  $\delta$  3.16 (s).

**1-(Ethynyl-2-*d*)-2-methoxybenzene (1c-*d*<sub>1</sub>; Table 4, entry 1) :** After the purification by silica gel chromatography (eluent; Et<sub>2</sub>O/pentanes 1/40), **1b-*d*<sub>1</sub>** (31.5 mg, 237  $\mu$ mol) was obtained in 95% as a colorless oil, <sup>1</sup>H NMR (500 MHz, CDCl<sub>3</sub>):  $\delta$  7.46 (dd, *J* = 7.8, 1.5 Hz, 1H), 7.32 (ddd, *J* = 9.0, 7.8, 1.5 Hz, 1H), 6.91 (dd, *J* = 7.8, 7.8 Hz, 1H), 6.89 (d, *J* = 9.0 Hz, 1H), 3.89 (s, 3H), 3.32 (s, 0.04H); <sup>2</sup>H NMR (61 MHz, CHCl<sub>3</sub>):  $\delta$  3.32 (s).

**1-(Ethynyl-2-*d*)-2-trifluoromethylbenzene-*d*<sub>1</sub> (1d-*d*<sub>1</sub>; Table 4, entry 2) :** After the purification by silica gel chromatography (eluent; Et<sub>2</sub>O/pentanes 1/40), **1d-*d*<sub>1</sub>** (25.3 mg, 148  $\mu$ mol) was obtained in 59% as a colorless oil, <sup>1</sup>H NMR (500 MHz, CDCl<sub>3</sub>):  $\delta$  7.67 (d, *J* = 7.5 Hz, 1H), 7.65 (d, *J* = 7.0 Hz, 1H), 7.51 (dd, *J* = 7.5, 7.0 Hz, 1H), 7.45 (dd, *J* = 7.5, 7.5 Hz, 1H), 3.37 (m, 0.01H); <sup>2</sup>H NMR (61 MHz, CHCl<sub>3</sub>):  $\delta$  3.39 (s).

**2-(Propynyl-3-*d*)-benzoate (1e-*d*<sub>1</sub>; Table 4, entry 3) :** **1e-*d*<sub>1</sub>** (36.8 mg, 250  $\mu$ mol) was obtained in 100% as a colorless oil, <sup>1</sup>H NMR (500 MHz, CDCl<sub>3</sub>):  $\delta$  8.07 (dd, *J* = 8.5, 1.5 Hz, 2H), 7.58 (tt, *J* = 7.5, 1.5 Hz, 1H), 7.45 (dd, *J* = 8.5, 7.5 Hz, 2H), 4.93 (s, 2H), 2.53 (brs, 0.01H); <sup>2</sup>H NMR (61 MHz, CHCl<sub>3</sub>):  $\delta$  2.51 (brs).

**[2-(Propynyl-3-*d*-oxy)methyl]-benzene (1f-*d*<sub>1</sub>; Table 4, entry 4) :** After the purification by silica gel chromatography (eluent; Et<sub>2</sub>O/pentanes 1/40), **1f-*d*<sub>1</sub>** (33.0 mg, 225  $\mu$ mol) was obtained in 90% as a colorless oil, <sup>1</sup>H NMR (500 MHz, CDCl<sub>3</sub>):  $\delta$  7.38–7.30 (m, 5H), 4.63 (s, 2H), 4.19 (s, 2H), 2.48 (s, 0.01H); <sup>2</sup>H NMR (61 MHz, CHCl<sub>3</sub>):  $\delta$  2.47 (s).

**1-Phenylthio-2-propyne-3-*d* (1g-*d*<sub>1</sub>; Table 4, entry 5) :** **1g-*d*<sub>1</sub>** (34.6 mg, 248  $\mu$ mol) was obtained in 99% as a colorless oil, <sup>1</sup>H NMR (500 MHz, CDCl<sub>3</sub>):  $\delta$  7.45 (dd, *J* = 8.0, 2.0, Hz, 2H), 7.32 (dd, *J* = 8.0, 7.5 Hz, 2H), 7.24 (tt, *J* = 7.5, 2.0 Hz, 1H), 3.60 (s, 2H), 2.23 (brs, 0.05H); <sup>2</sup>H NMR (61 MHz, CHCl<sub>3</sub>):  $\delta$  2.24 (brs).

**1-Dodecyne-1-*d* (1h-*d*<sub>1</sub>; Table 4, entry 6) :** **1h-*d*<sub>1</sub>** (27.3 mg, 163  $\mu$ mol) was obtained in 65% as a colorless oil, <sup>1</sup>H NMR (500 MHz, CDCl<sub>3</sub>):  $\delta$  2.18 (t, *J* = 7.5 Hz, 2H), 1.93 (brs, 0.03H), 1.52 (tt, *J* = 7.5, 7.5 Hz, 2H), 1.39–1.26 (m, 14H), 0.88 (t, *J* = 7.0 Hz, 3H); <sup>2</sup>H NMR (61 MHz, CHCl<sub>3</sub>):  $\delta$  1.92 (brs).

**1-Amino-4-(ethynyl-2-*d*)-benzene (1i-*d*<sub>1</sub>; Table 4, entry 7) : 1i-*d*<sub>1</sub>**; 91% (26.7 mg, 228 μmol) as a yellow solid, <sup>1</sup>H NMR (500 MHz, CDCl<sub>3</sub>): δ 7.30 (d, *J* = 9.0 Hz, 2H), 6.59 (d, *J* = 9.0 Hz, 2H), 3.82 (brs, 2H), 2.97 (s, 0.85H); <sup>2</sup>H NMR (61 MHz, CHCl<sub>3</sub>): δ 2.98 (brs).

**1-Amino-4-(ethynyl-2-*d*)-benzene (1i-*d*<sub>1</sub>; Table 4, entry 8) : 1i-*d*<sub>1</sub>** (28.7 mg, 243 μmol) was obtained in 97% as a yellow solid, <sup>1</sup>H NMR (400 MHz, CDCl<sub>3</sub>): δ 7.29 (d, *J* = 8.8 Hz, 2H), 6.58 (d, *J* = 8.8 Hz, 2H), 3.80 (brs, 2H), 2.96 (s, 0.03H); <sup>2</sup>H NMR (61 MHz, CHCl<sub>3</sub>): δ 2.98 (brs).

**1-(ethynyl-2-*d*)-4-nitrobenzene (1j-*d*<sub>1</sub>; Table 4, entry 9) : 1j-*d*<sub>1</sub>** (34.6 mg, 235 μmol) was obtained in 94% as a yellow solid, <sup>1</sup>H NMR (500 MHz, CDCl<sub>3</sub>): δ 8.19 (d, *J* = 8.5 Hz, 2H), 7.63 (d, *J* = 8.5 Hz, 2H), 3.36 (s, 0.18H); <sup>2</sup>H NMR (61 MHz, CHCl<sub>3</sub>): δ 3.37 (brs).

**1-(Ethynyl-2-*d*)-4-nitrobenzene (1j-*d*<sub>1</sub>; Table 4, entry 10) : 1j-*d*<sub>1</sub>** (36.0 mg, 243 μmol) was obtained in 97% as an yellow solid, <sup>1</sup>H NMR (400 MHz, CDCl<sub>3</sub>): δ 8.19 (d, *J* = 8.2 Hz, 2H), 7.64 (d, *J* = 8.2 Hz, 2H), 3.64 (s, 0.06H); <sup>2</sup>H NMR (61 MHz, CHCl<sub>3</sub>): δ 3.33 (brs).

**6-(Ethynyl-2-*d*)-2-methoxynaphthalene (1k-*d*<sub>1</sub>; Table 4, entry 11) : 1k-*d*<sub>1</sub>** (44.7 mg, 245 μmol) was obtained in 98% as a colorless solid, <sup>1</sup>H NMR (500 MHz, CDCl<sub>3</sub>): δ 7.93 (s, 1H), 7.67–7.63 (m, 2H), 7.48 (dd, *J* = 10.0, 1.5 Hz, 1H), 7.14 (dd, *J* = 9.0, 2.0 Hz, 1H), 7.07 (d, *J* = 1.5 Hz, 1H), 3.89 (s, 3H), 3.10 (s, 0.81H); <sup>2</sup>H NMR (61 MHz, CHCl<sub>3</sub>): δ 3.15 (brs).

**6-(Ethynyl-2-*d*)-2-methoxynaphthalene (1k-*d*<sub>1</sub>; Table 4, entry 12) : 1k-*d*<sub>1</sub>** (45.8 mg, 250 μmol) was obtained in 100% as a colorless solid, <sup>1</sup>H NMR (500 MHz, CDCl<sub>3</sub>): δ 7.97 (s, 1H), 7.71–7.67 (m, 2H), 7.51 (dd, *J* = 8.5, 1.0 Hz, 1H), 7.18 (dd, *J* = 8.5, 2.0 Hz, 1H), 7.10 (d, *J* = 2.0 Hz, 1H), 3.92 (s, 3H), 3.14 (s, 0.04H); <sup>2</sup>H NMR (61 MHz, CHCl<sub>3</sub>): δ 3.12 (brs).

***N*-[2-(Propynyl-3-*d*-oxy)]-phthalimide (1l-*d*<sub>1</sub>; Table 4, entry 13) : 1l-*d*<sub>1</sub>** (43.2 mg, 215 μmol) was obtained in 86% as a colorless solid, <sup>1</sup>H NMR (500 MHz, CDCl<sub>3</sub>): δ 7.85–7.83 (m, 2H), 7.77–7.74 (m, 2H), 4.86 (d, *J* = 2.0 Hz, 2H), 2.59 (t, *J* = 2.0 Hz, 0.81H); <sup>2</sup>H NMR (61 MHz, CHCl<sub>3</sub>): δ 2.59 (brs).

***N*-[2-(Propynyl-3-*d*-oxy)]-phthalimide (1l-*d*<sub>1</sub>; Table 4, entry 14) : 1l-*d*<sub>1</sub>** (44.6 mg, 223

μmol) was obtained in 89% as a colorless solid, <sup>1</sup>H NMR (500 MHz, CDCl<sub>3</sub>): δ 7.85–7.82 (m, 2H), 7.78–7.40 (m, 2H), 4.86 (d, *J* = 1.0 Hz, 2H), 2.59 (t, *J* = 1.0 Hz, 0.64H); <sup>2</sup>H NMR (61 MHz, CHCl<sub>3</sub>): δ 2.59 (m).

**(8S,9S,13S,14R,17S)-17-(ethynyl-2-*d*)-8-methyl-7,8,9,11,12,13,14,15,16,17-decahydro-6H-cyclopenta[*a*]phenanthrene-3,17-diol (1m-*d*<sub>1</sub>; Table 4, entry 16) :** 1m-*d*<sub>1</sub> (69.5 mg, 235 μmol) was obtained in 94% as a colorless solid, <sup>1</sup>H NMR (500 MHz, CD<sub>3</sub>OD): δ 7.06 (d, *J* = 8.0 Hz, 1H), 6.54 (dd, *J* = 8.0, 2.5 Hz, 1H), 6.47 (d, *J* = 2.5 Hz, 1H), 2.86 (s, 0.07H), 2.80–2.70 (m, 2H), 2.32–2.22 (m, 2H), 2.12–2.08 (m, 1H), 2.00–1.90 (m, 2H), 1.85–1.82 (m, 1H), 1.77–1.70 (m, 2H), 1.44–1.22 (m, 4H), 0.84 (s, 3H); <sup>2</sup>H NMR (61 MHz, CH<sub>3</sub>OH): δ 2.83 (brs).

## 8. Reference

1) D. Farran, A. M. Z. Slawin, P. Kirsch and D. O'Hagan, *J. Org. Chem.*, 2009, **74**, 7168–7171.

## 9. $^1\text{H}$ and $^2\text{H}$ NMR spectra of deuterated terminal alkynes

### $^1\text{H}$ NMR of $1a-d_1$

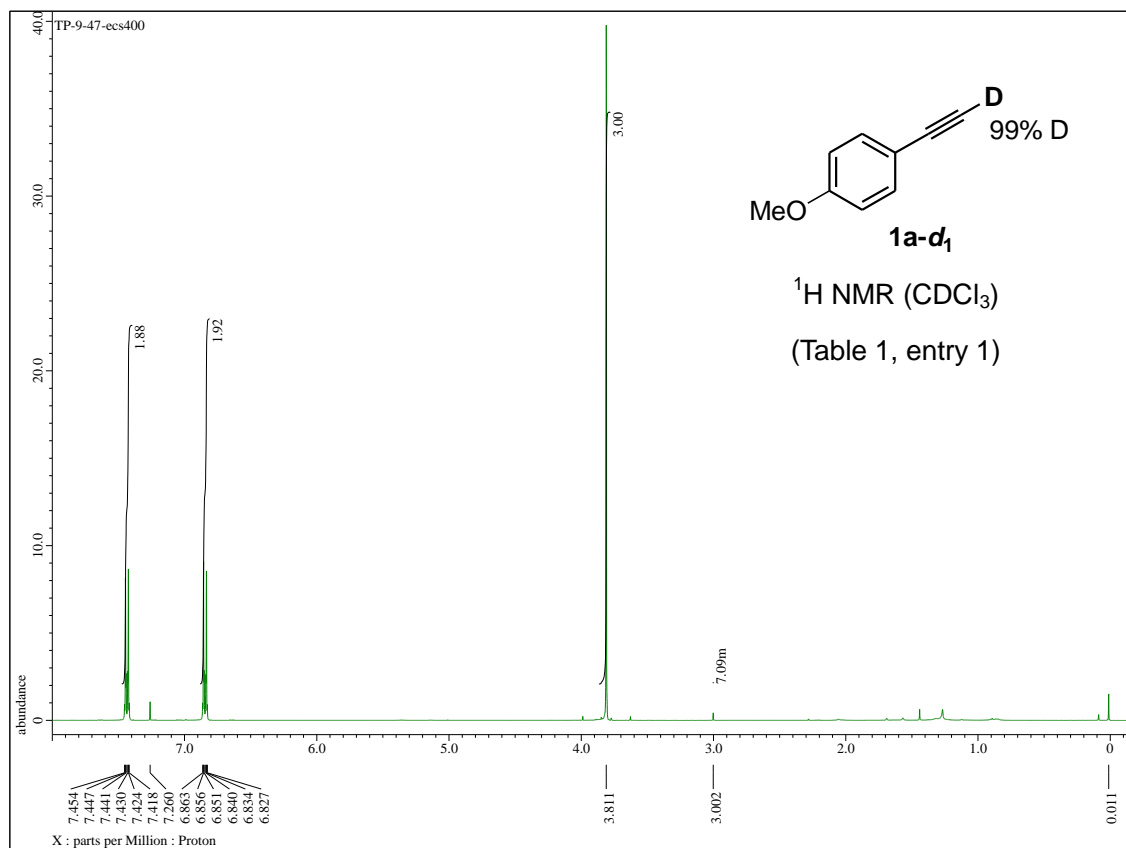

### $^2\text{H}$ NMR of $1a-d_1$

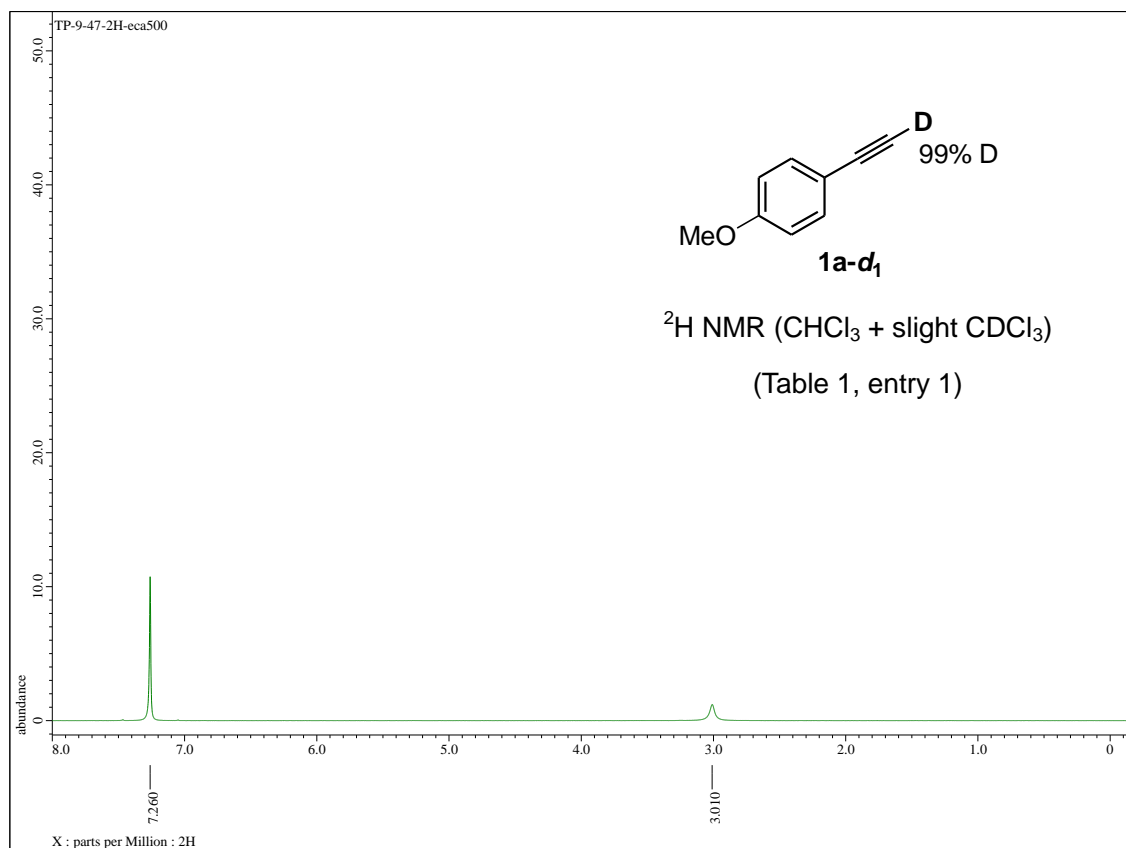

### $^1\text{H}$ NMR of **1b-d<sub>1</sub>**

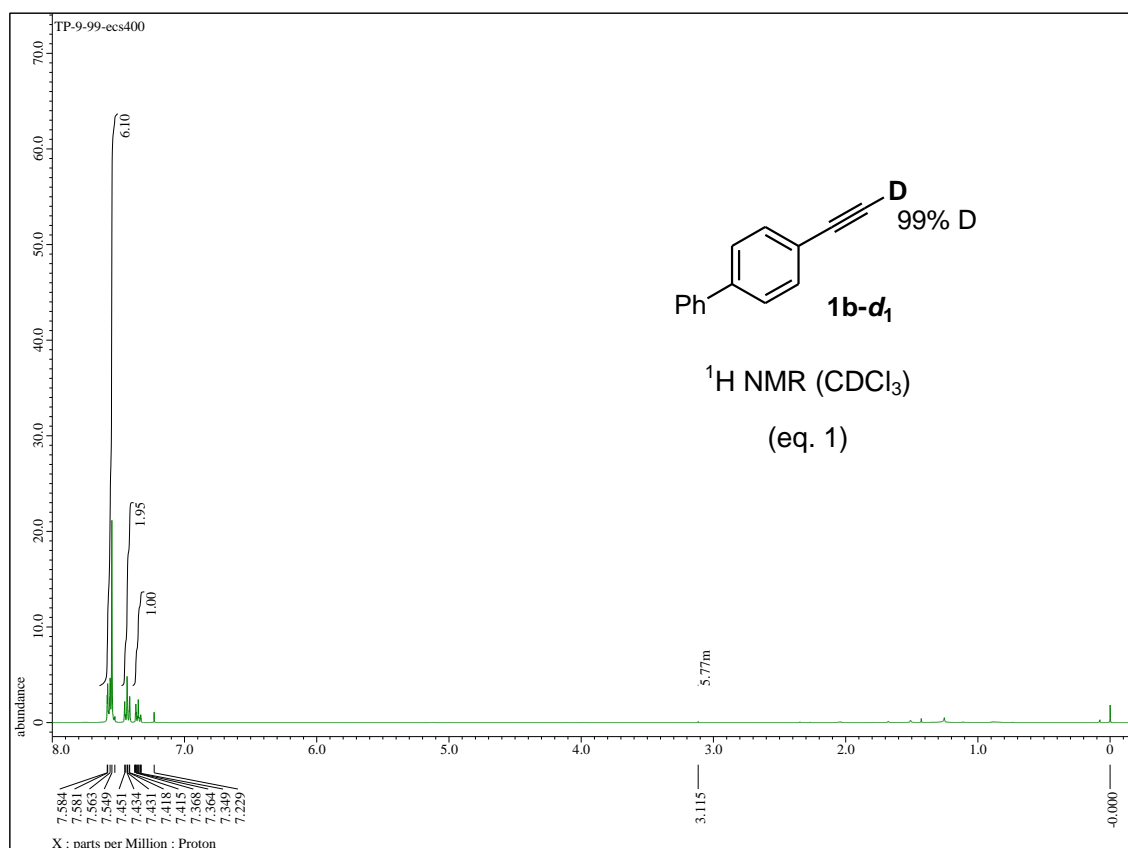

### $^2\text{H}$ NMR of **1b-d<sub>1</sub>**

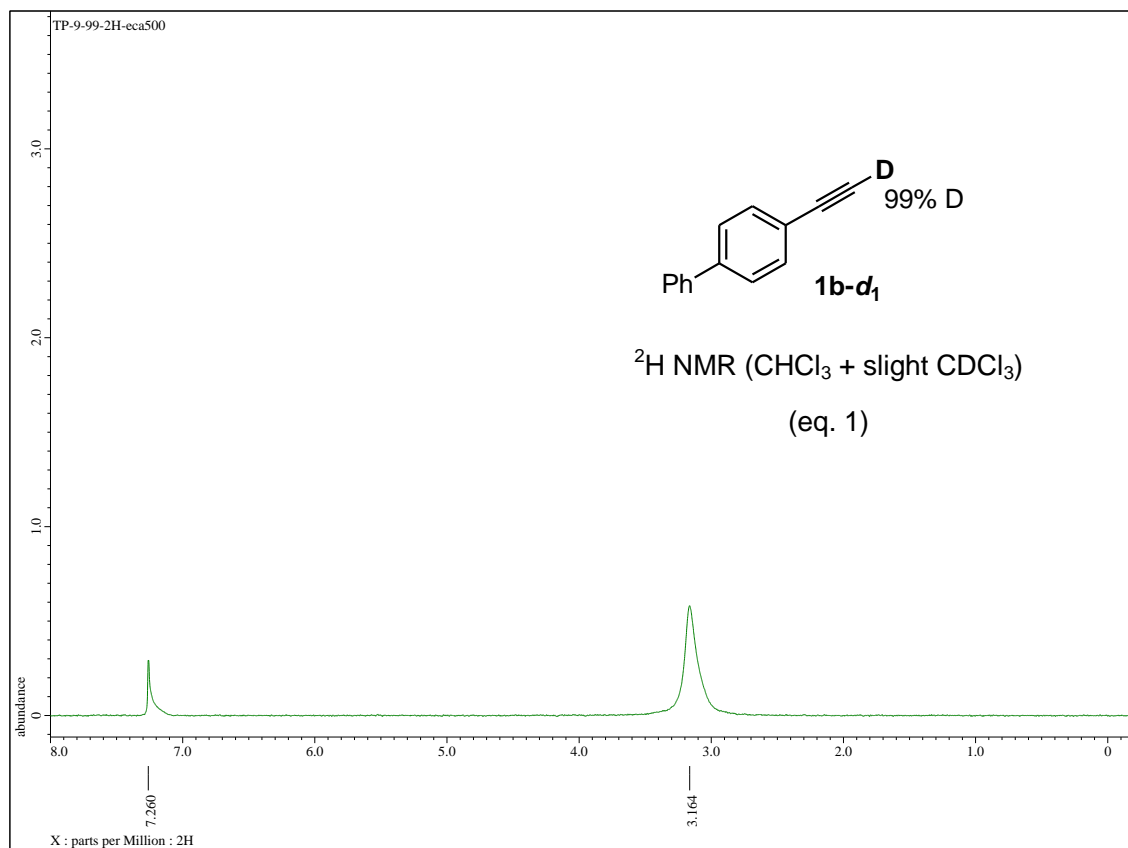

### $^1\text{H}$ NMR of **1c-d<sub>1</sub>**

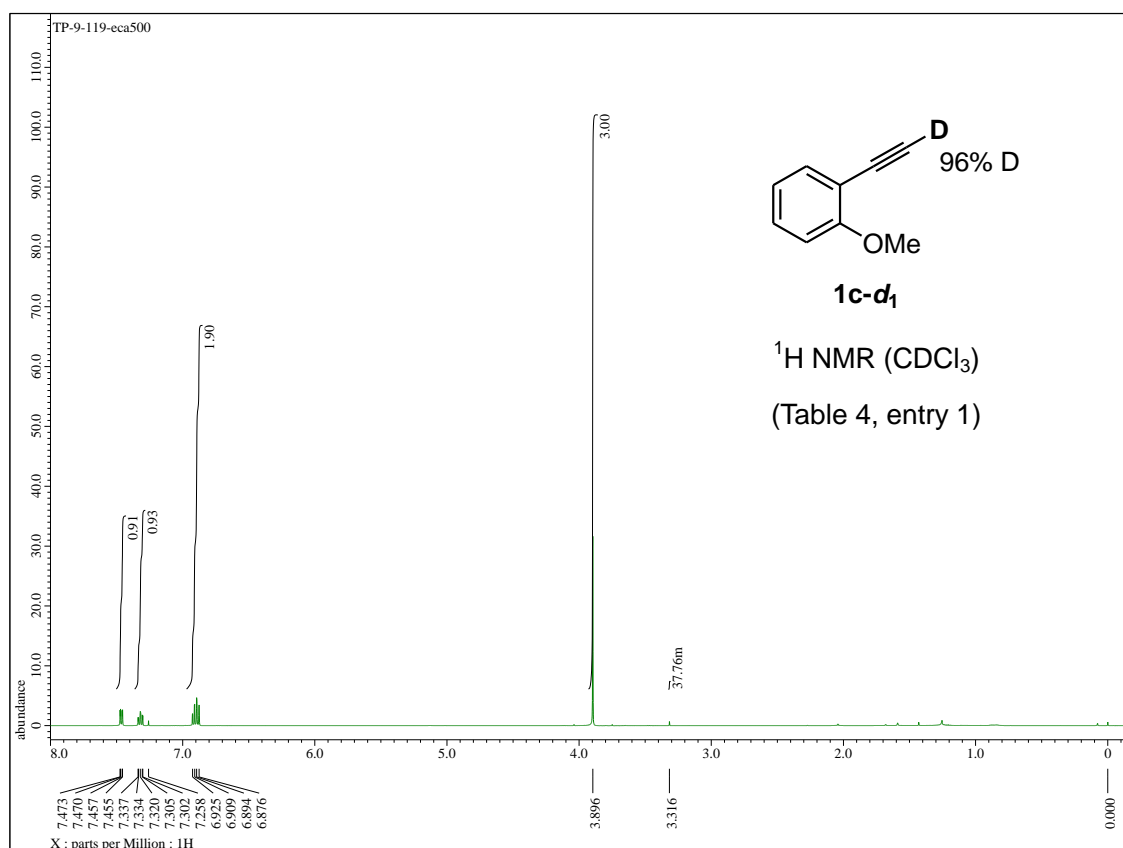

### $^2\text{H}$ NMR of **1c-d<sub>1</sub>**

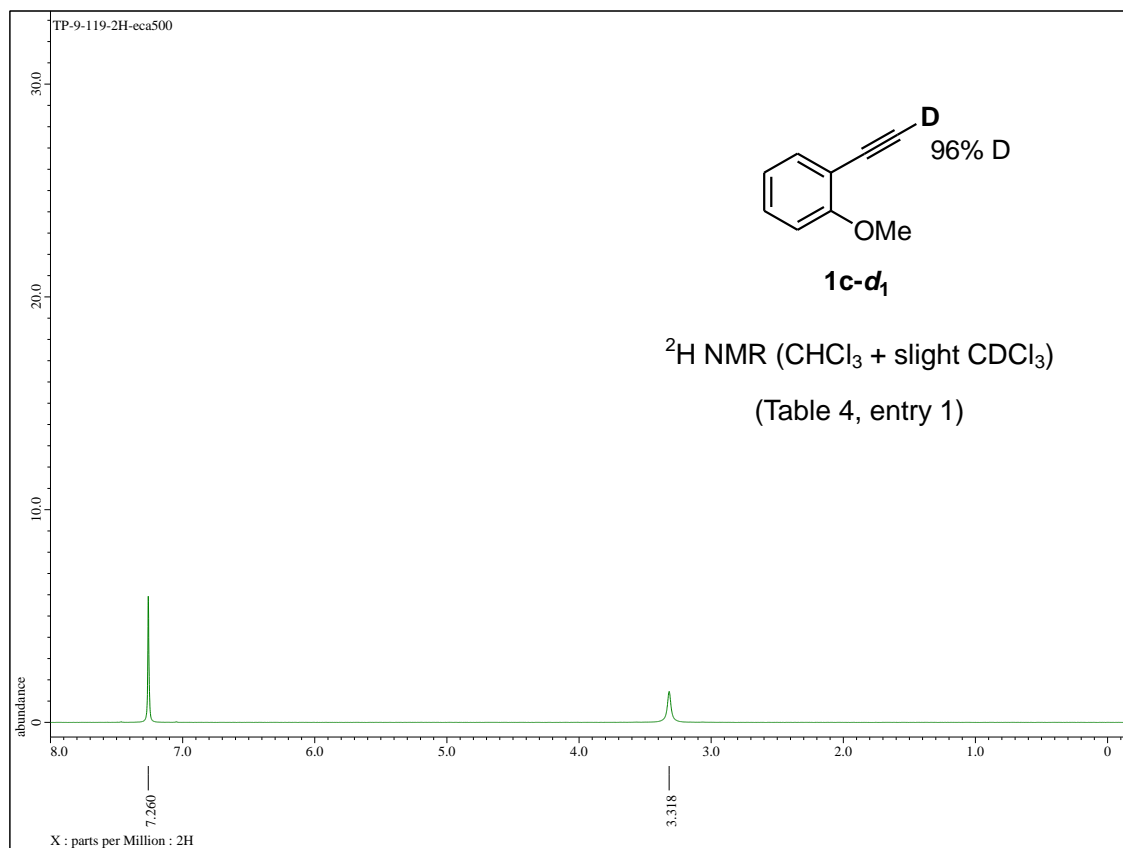

### $^1\text{H}$ NMR of **1d-d<sub>1</sub>**

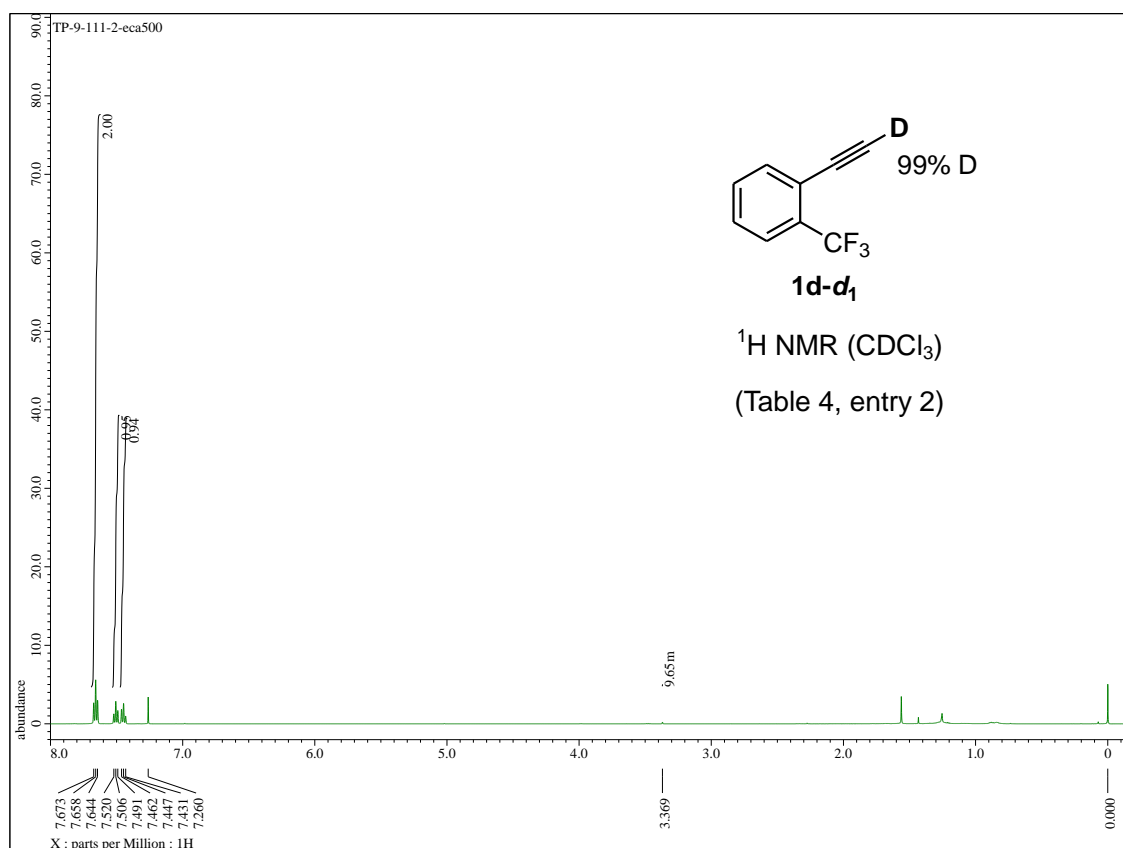

### $^2\text{H}$ NMR of **1d-d<sub>1</sub>**

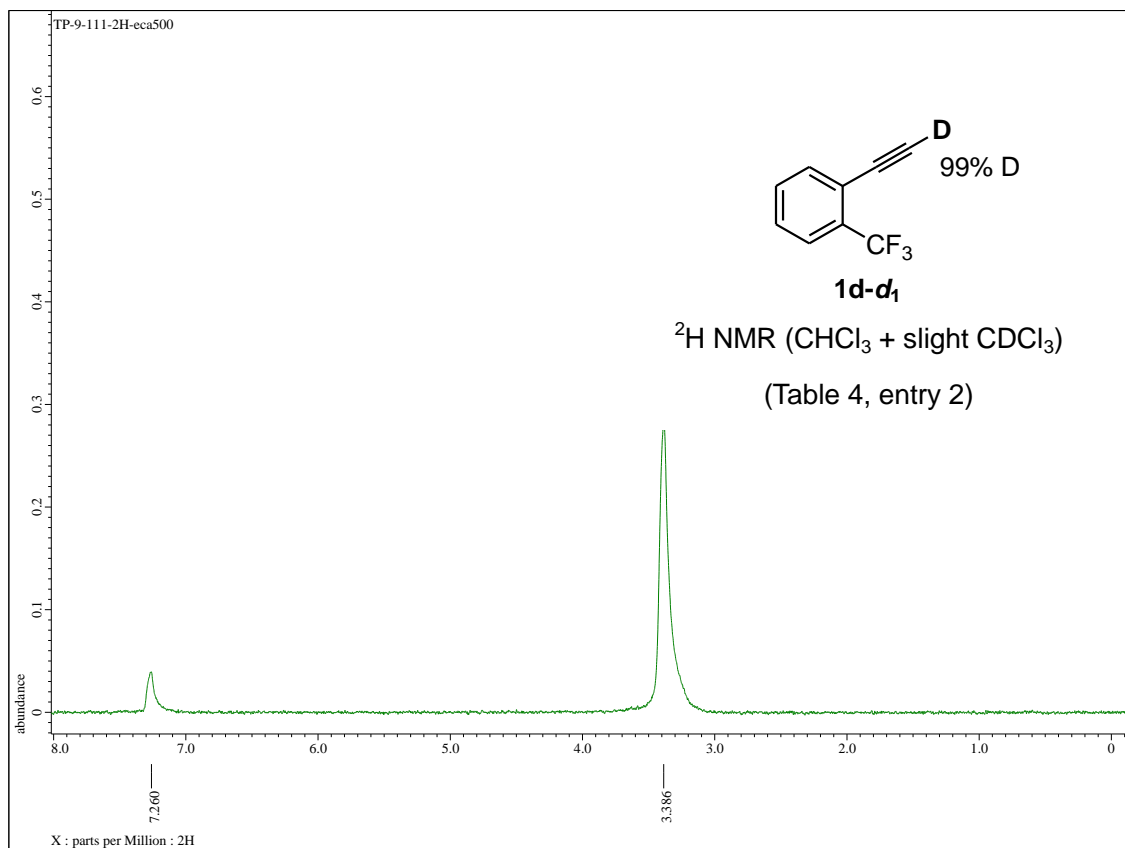

### $^1\text{H}$ NMR of **1e-d<sub>1</sub>**

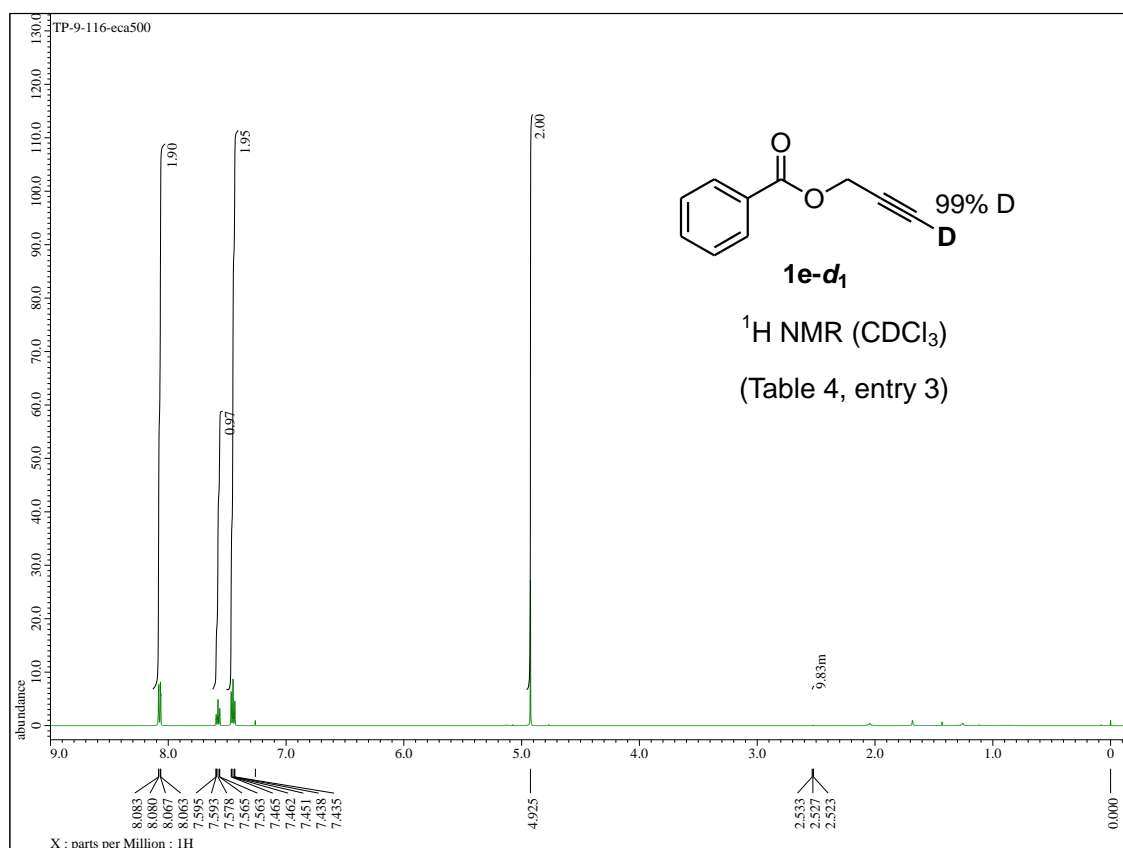

### $^2\text{H}$ NMR of **1e-d<sub>1</sub>**

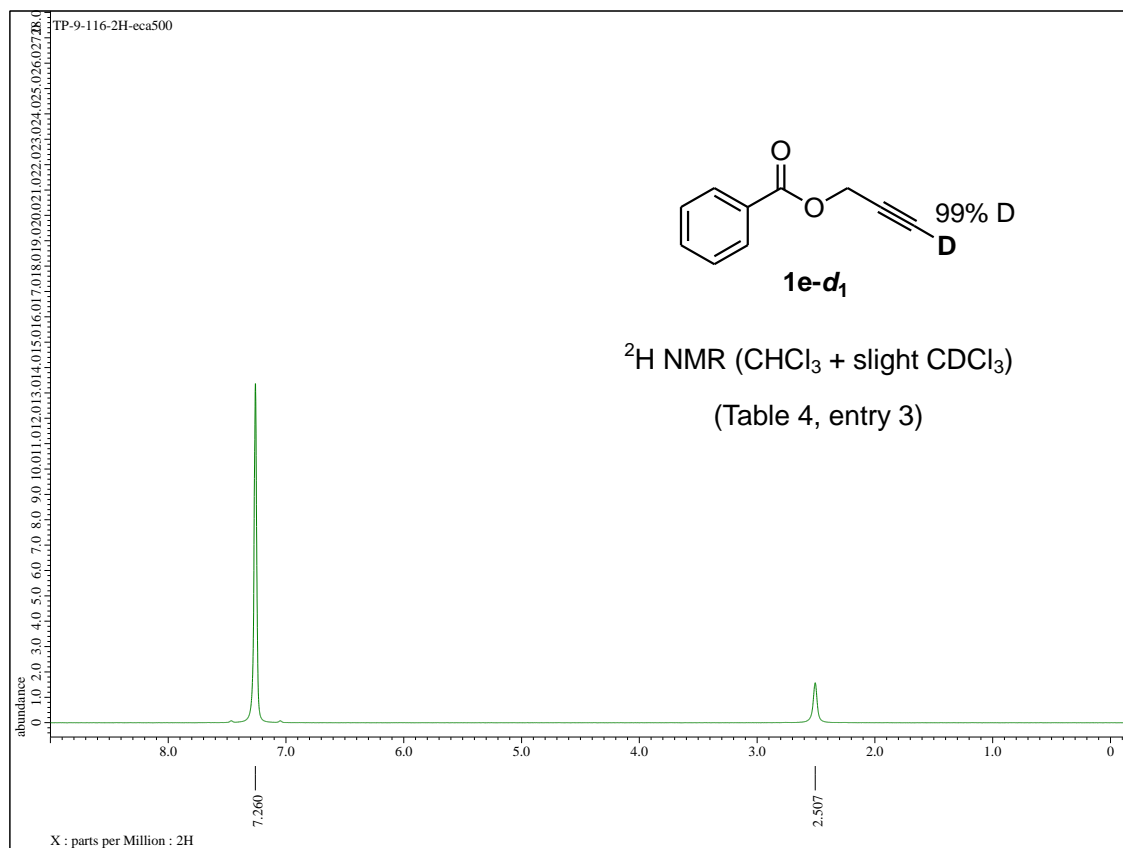

### $^1\text{H}$ NMR of **1f-d<sub>1</sub>**

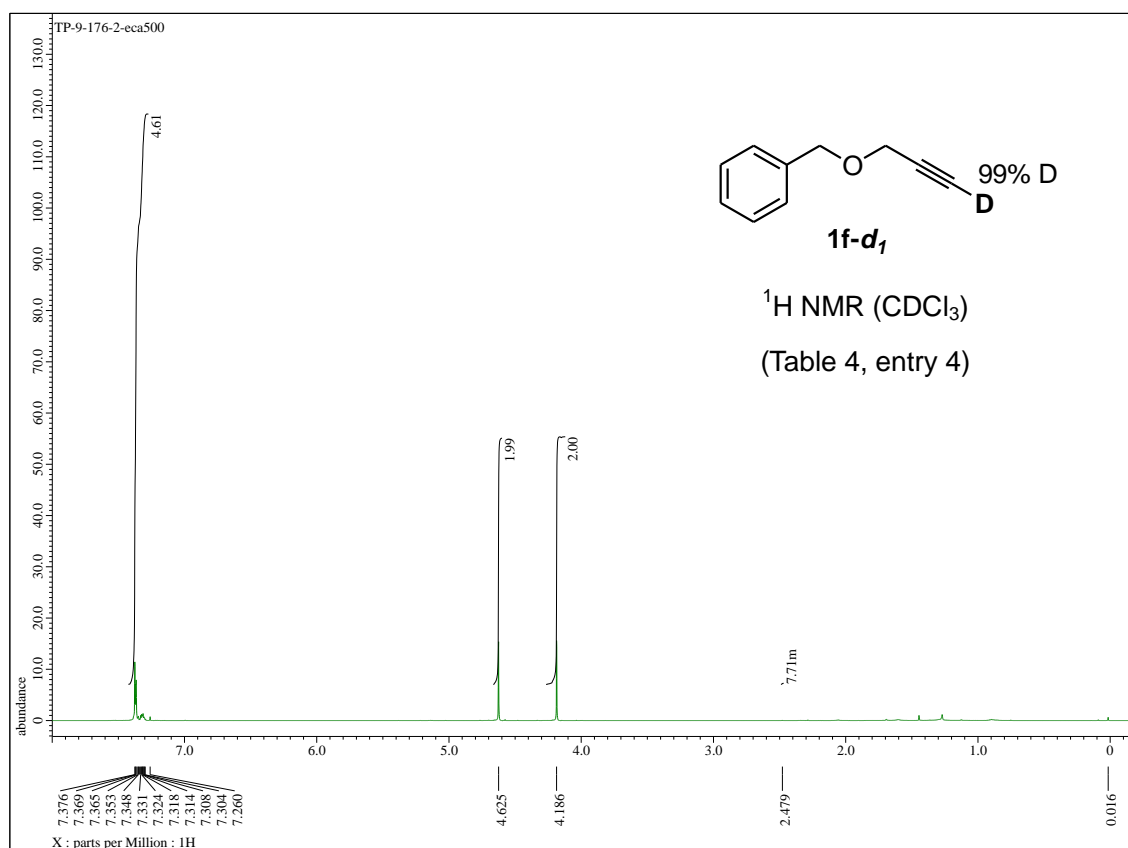

### $^2\text{H}$ NMR of **1f-d<sub>1</sub>**

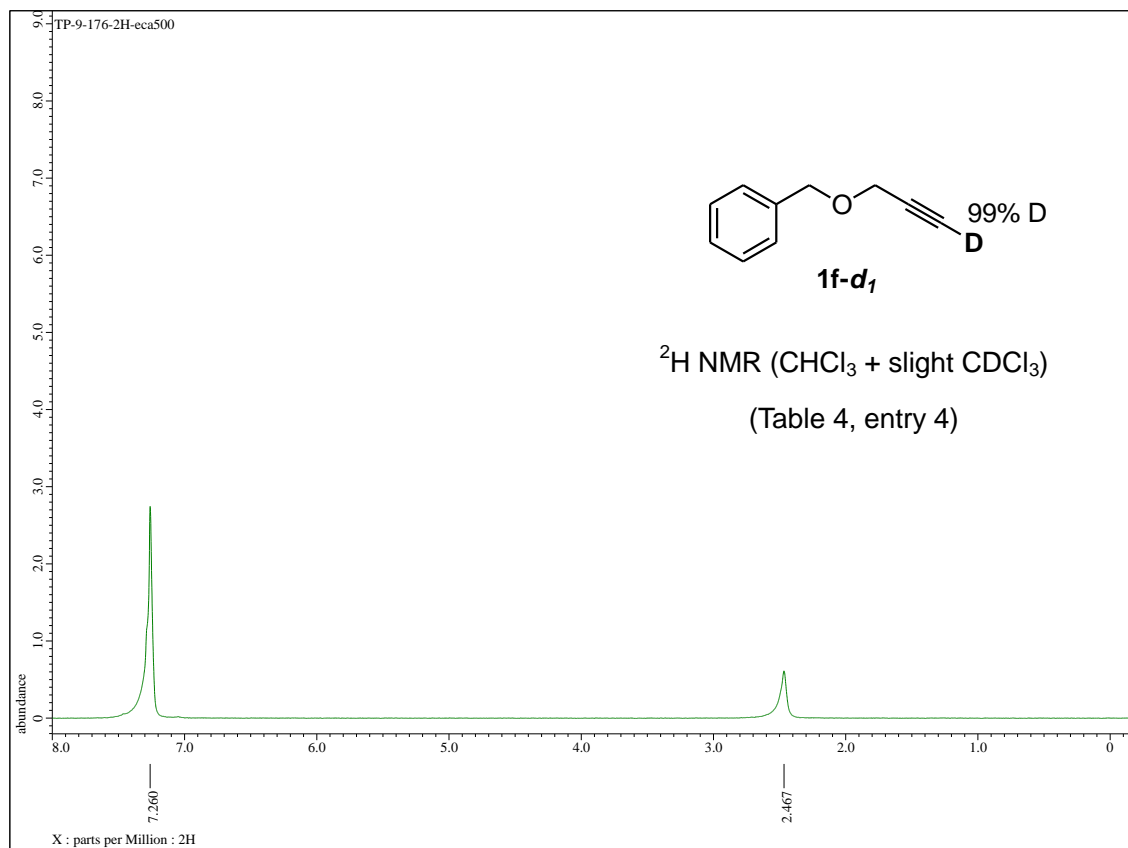

### $^1\text{H}$ NMR of **1g-d<sub>1</sub>**

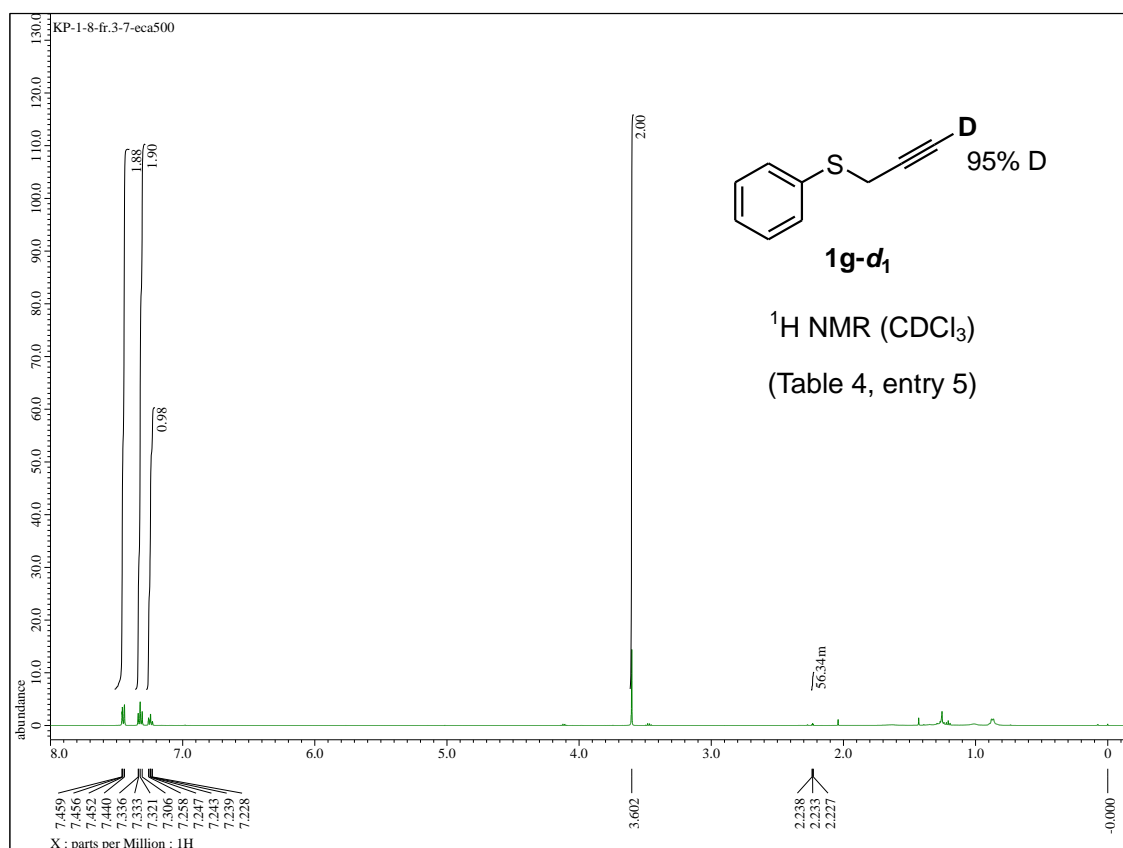

### $^2\text{H}$ NMR of **1g-d<sub>1</sub>**

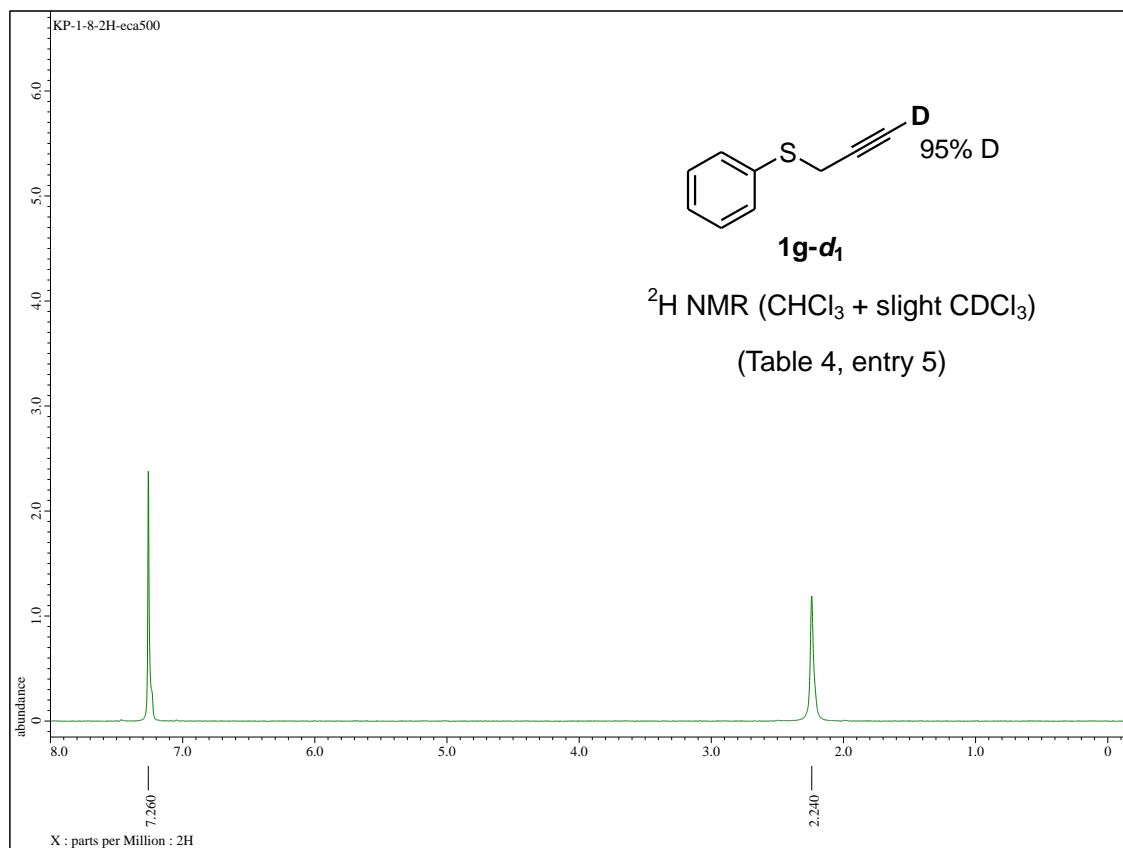

# <sup>1</sup>H NMR of 1h-d<sub>1</sub>

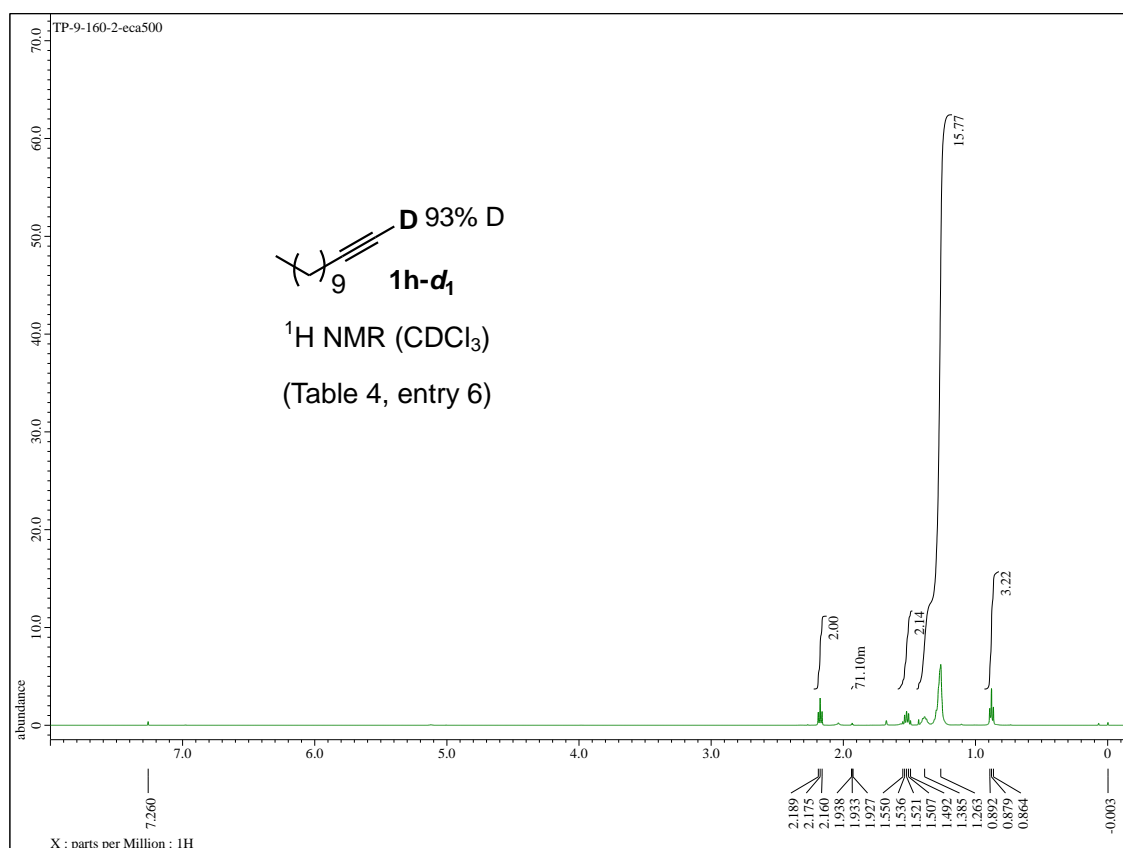

# <sup>2</sup>H NMR of 1h-d<sub>1</sub>

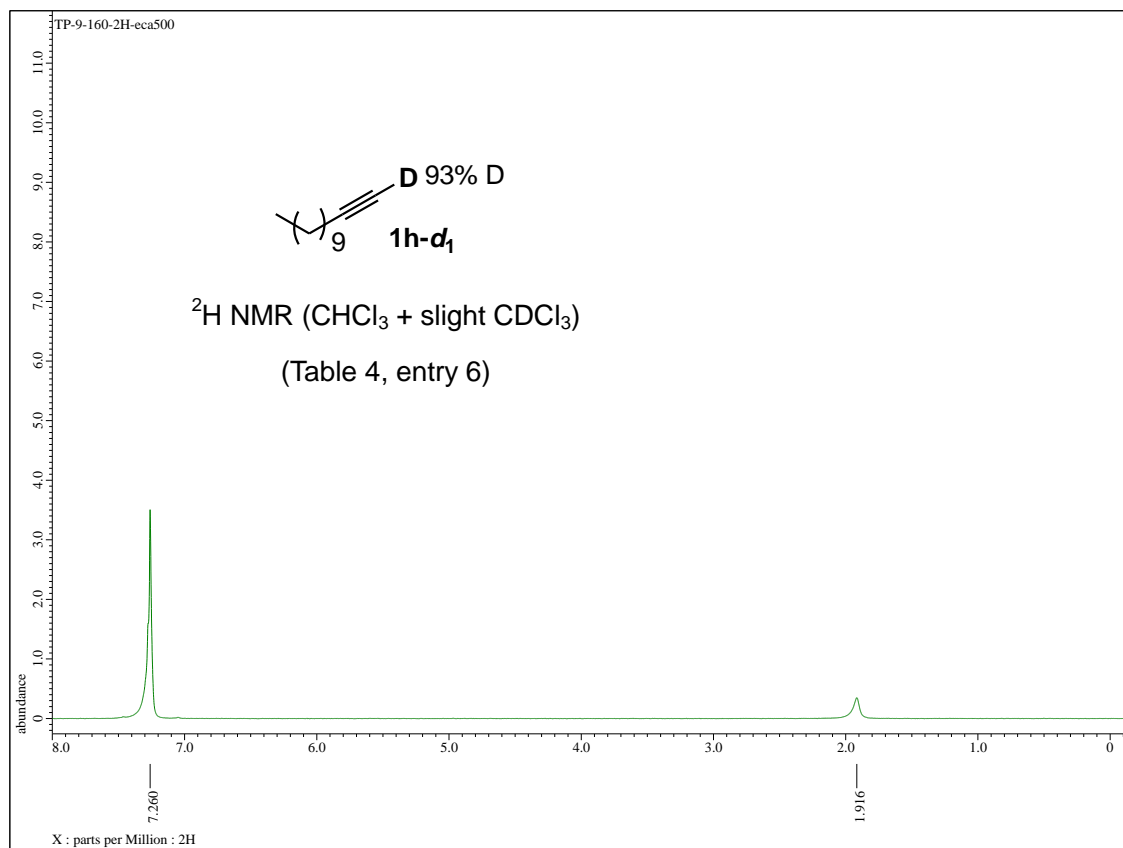

### $^1\text{H}$ NMR of **1i-d<sub>1</sub>**

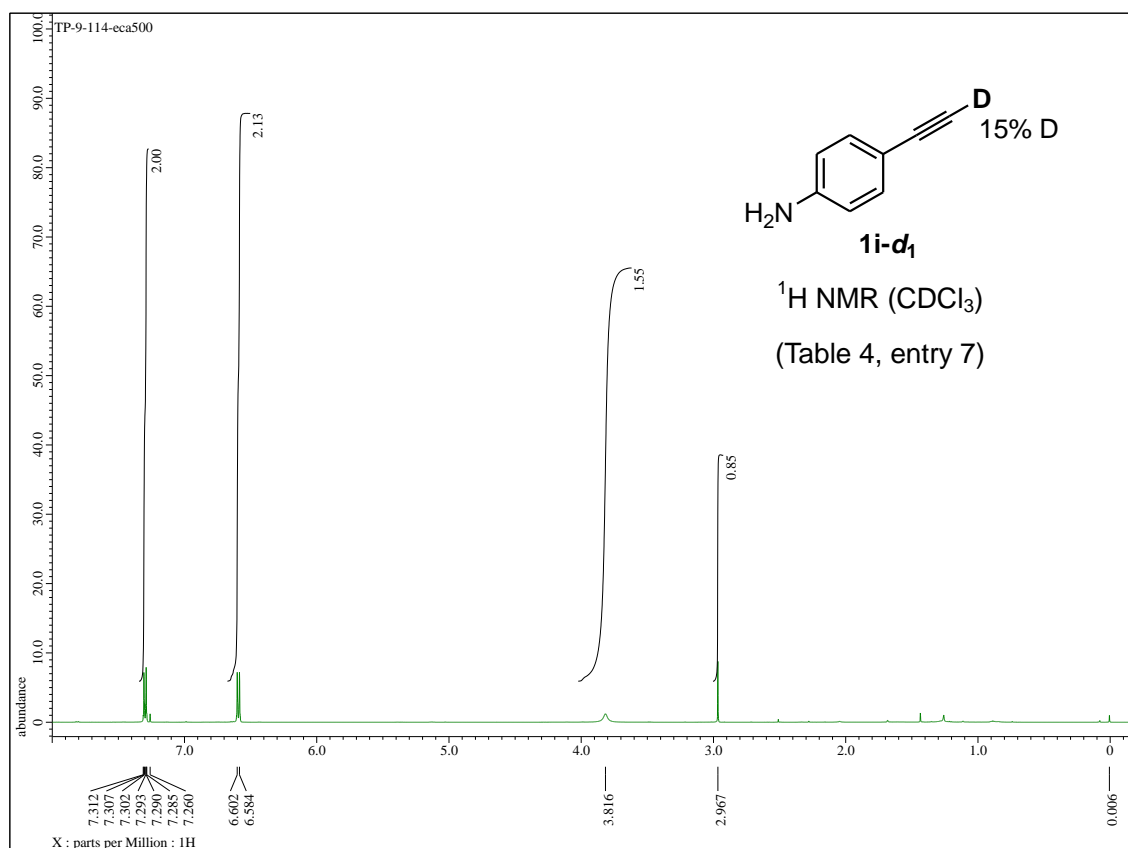

### $^2\text{H}$ NMR of **1i-d<sub>1</sub>**

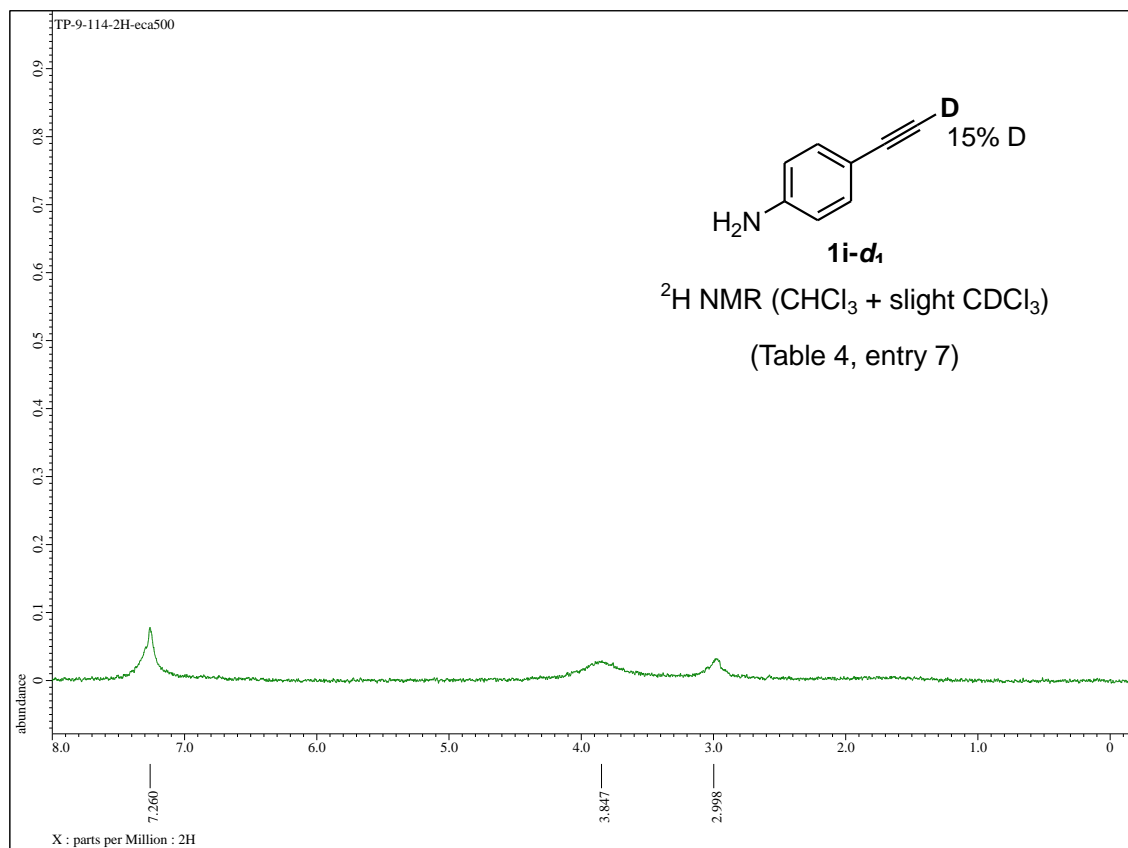

**$^1\text{H}$  NMR of **1i-d<sub>1</sub>****

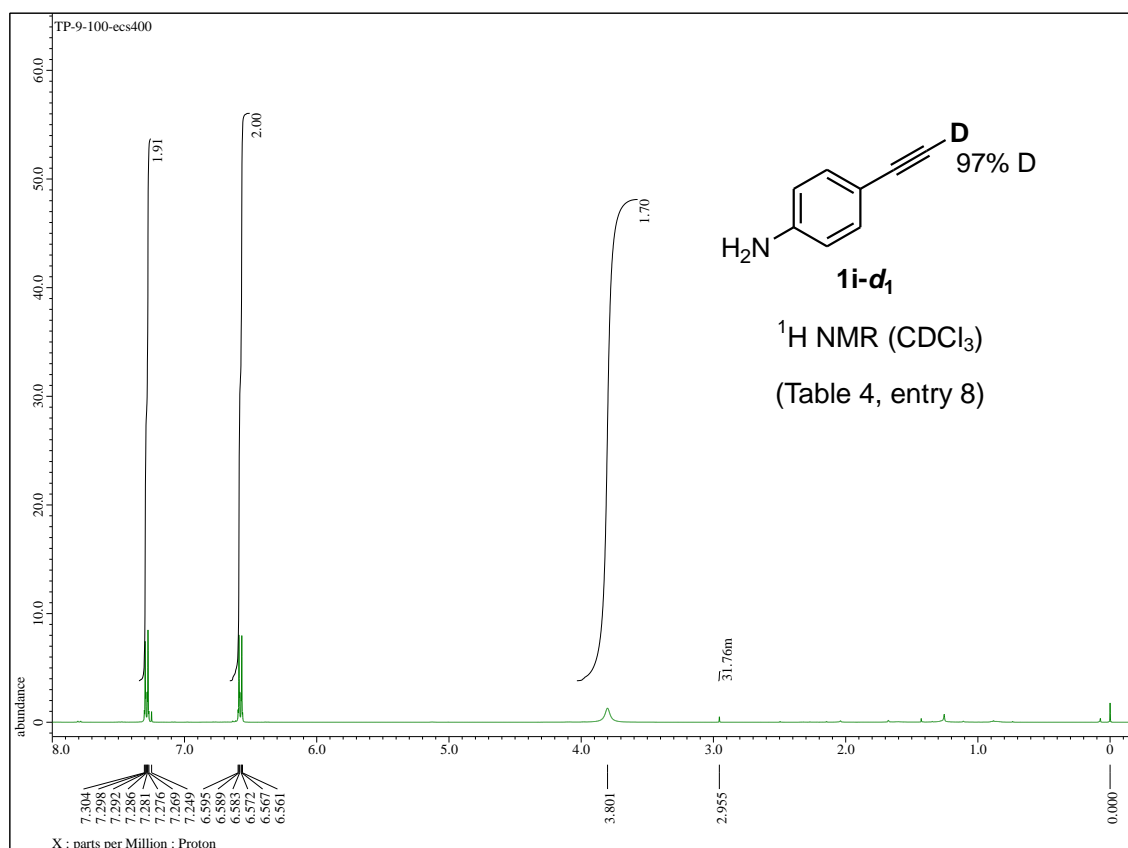

**$^2\text{H}$  NMR of **1i-d<sub>1</sub>** (Using  $\text{D}_2\text{O}$  as a solvent)**

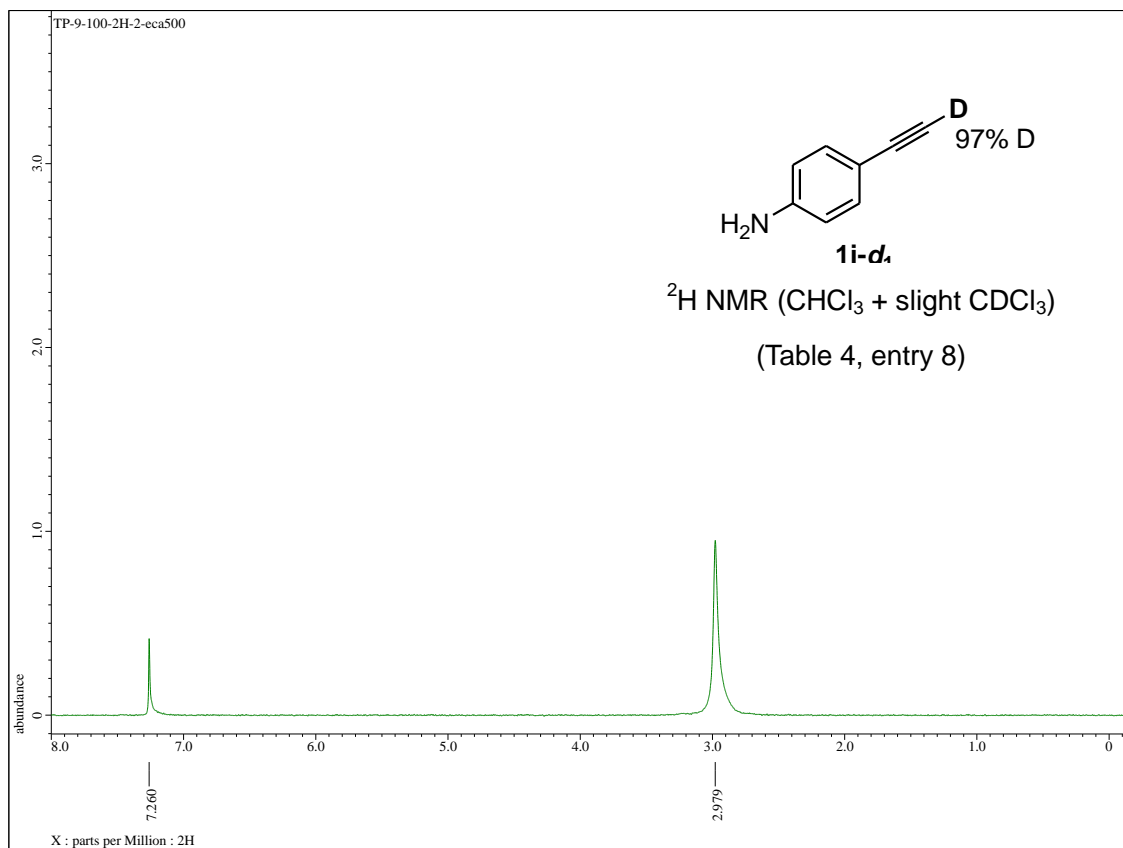

### $^1\text{H}$ NMR of **1j-d<sub>1</sub>**

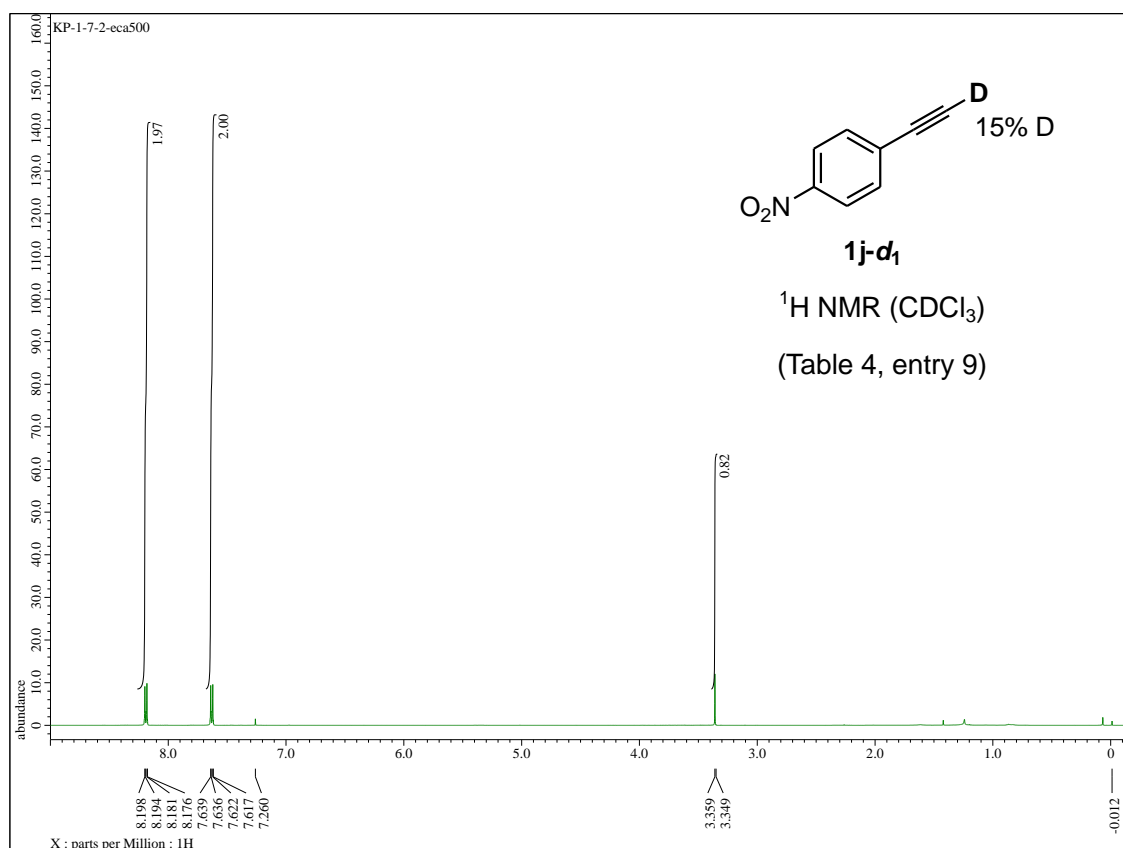

### $^2\text{H}$ NMR of **1j-d<sub>1</sub>**

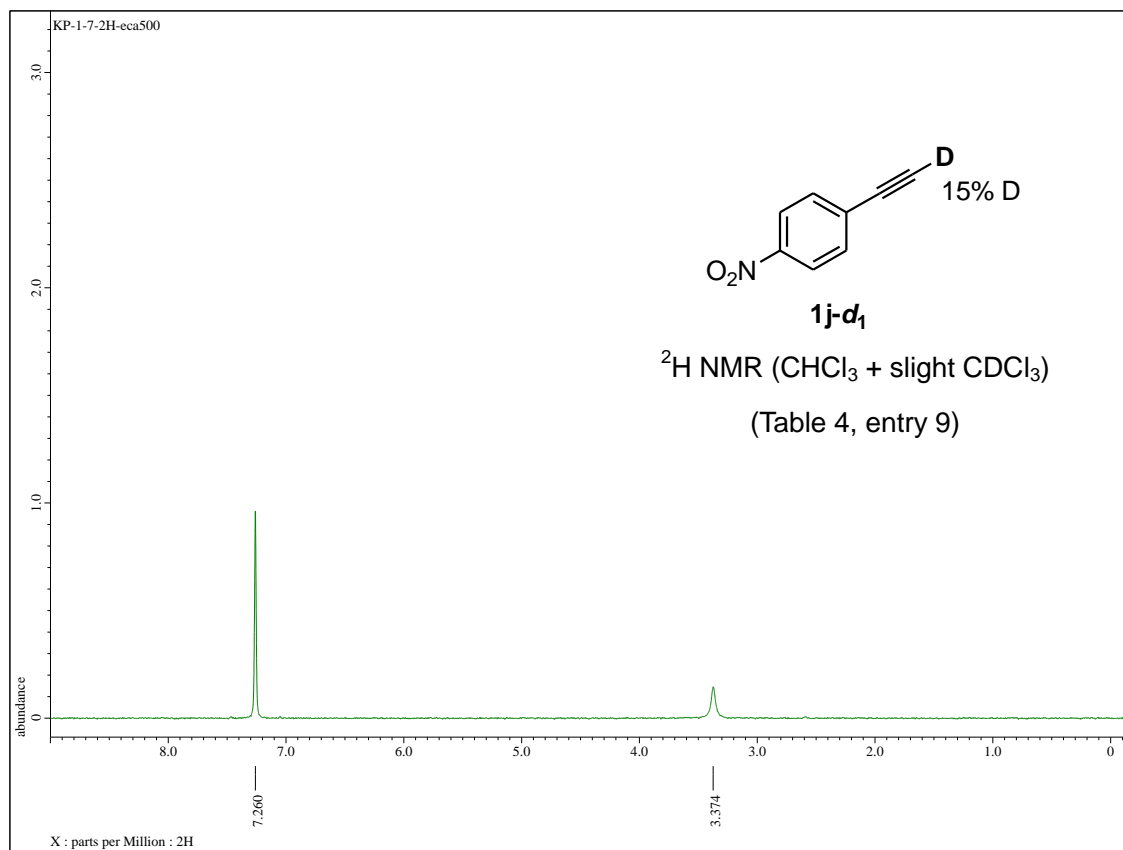

### $^1\text{H}$ NMR of **1j-d<sub>1</sub>**

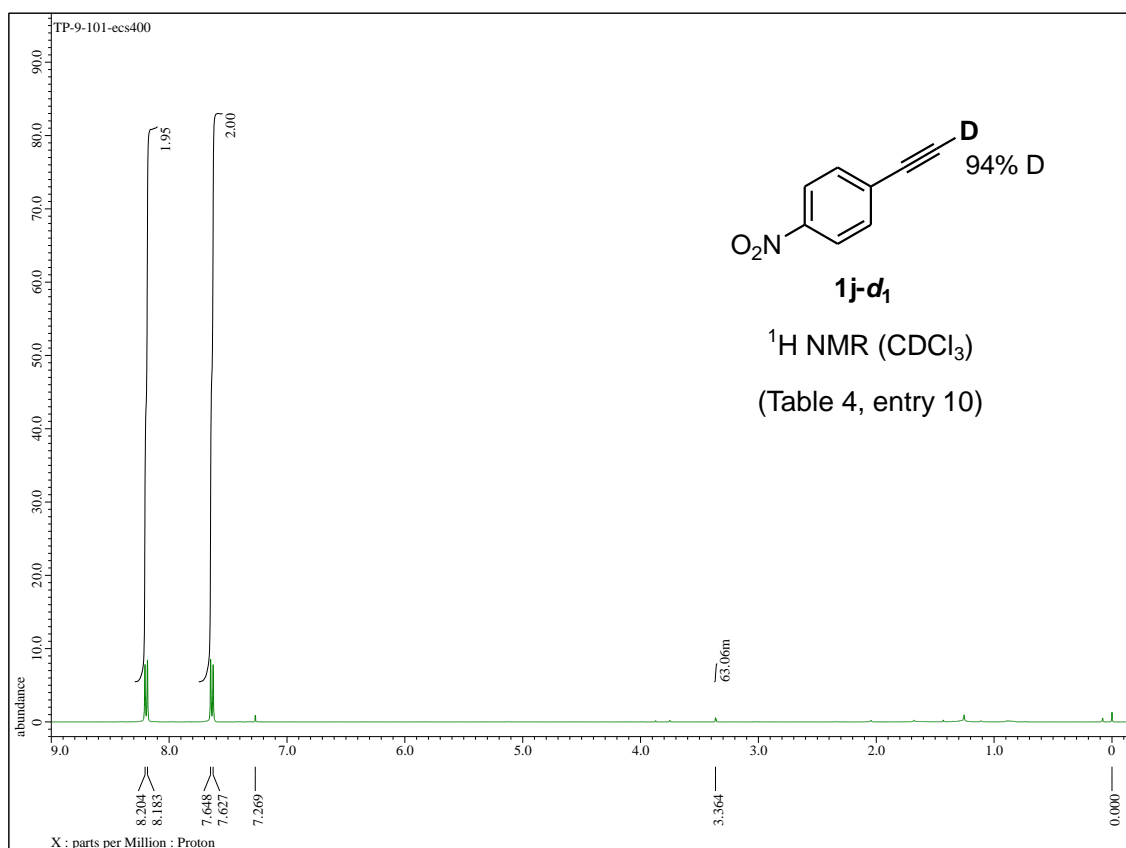

### $^2\text{H}$ NMR of **1j-d<sub>1</sub>**

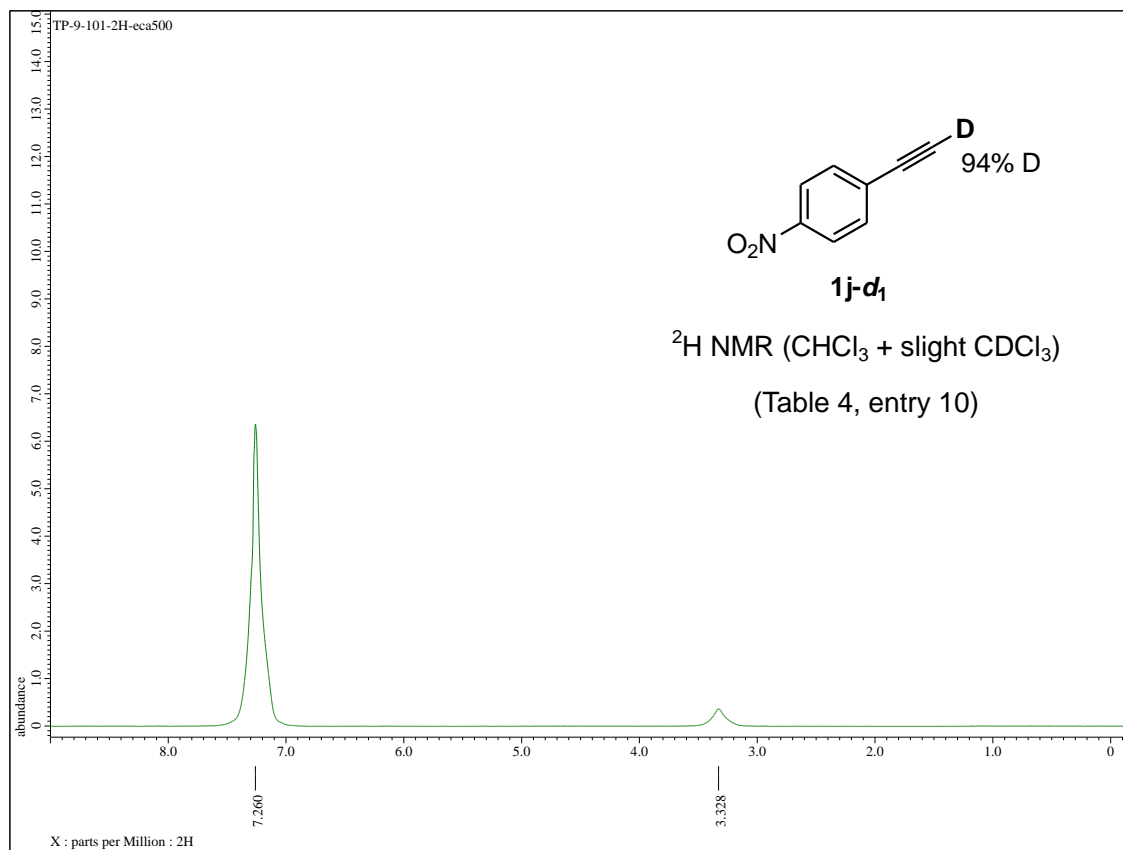

### $^1\text{H}$ NMR of $1\text{k-d}_1$

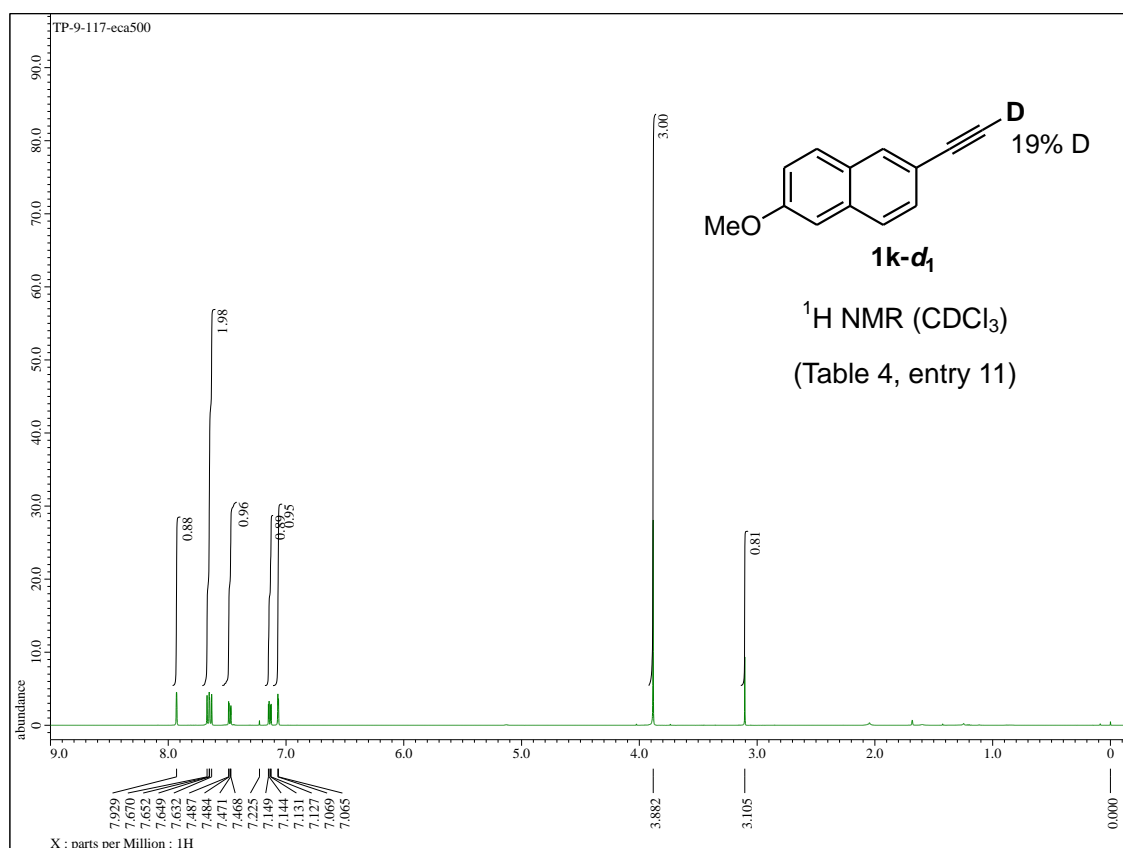

### $^2\text{H}$ NMR of $1\text{k-d}_1$

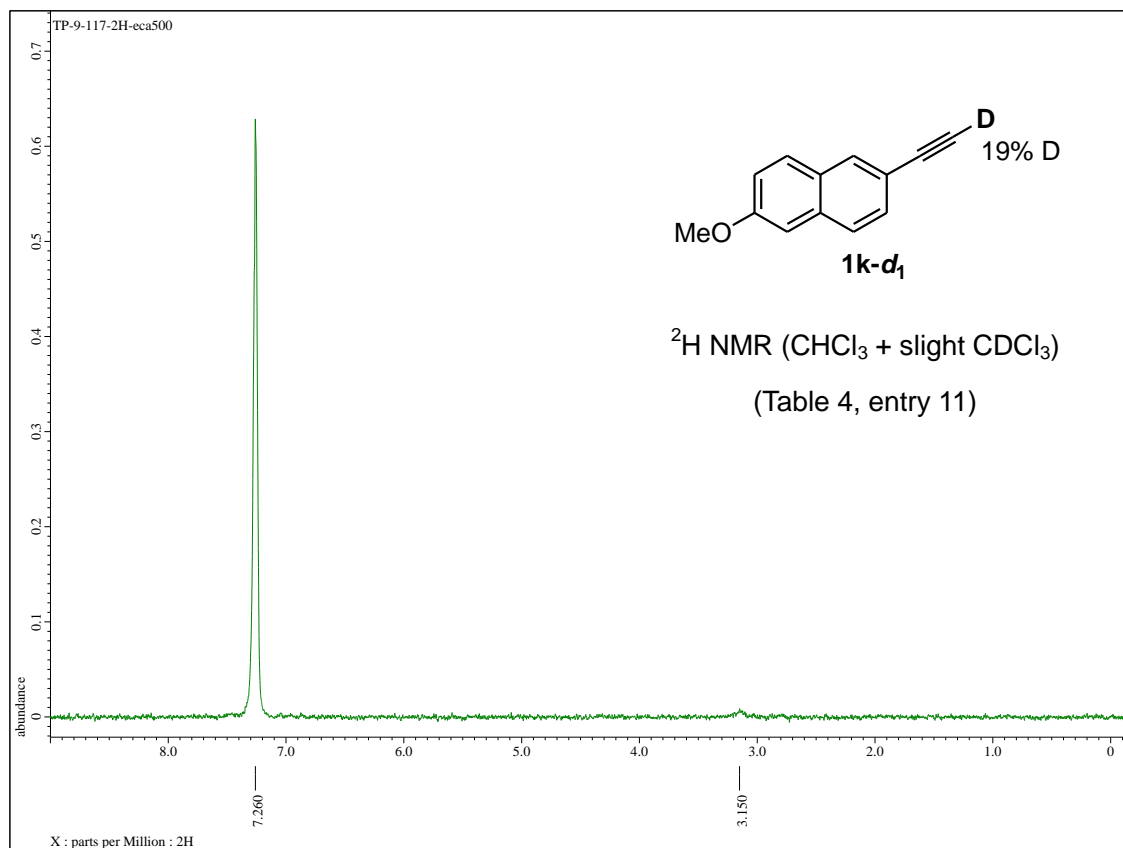

### $^1\text{H}$ NMR of $1\text{k-d}_1$

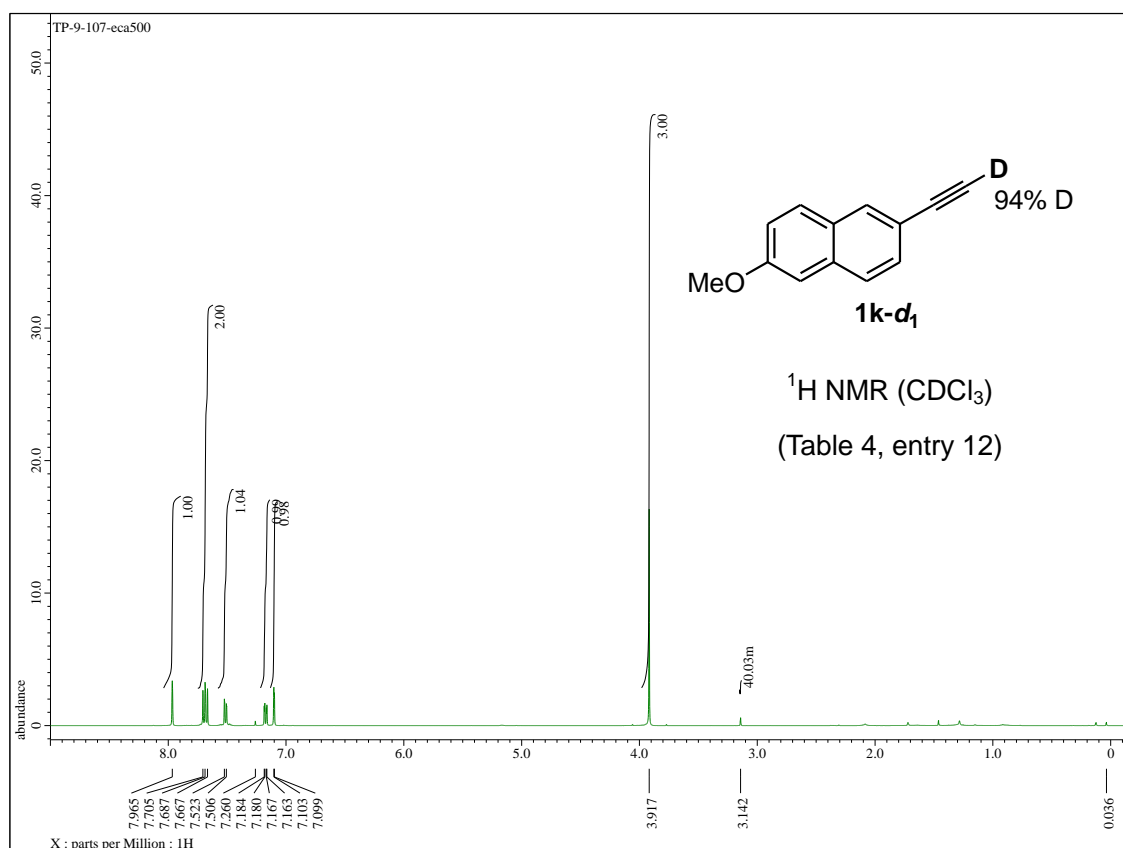

### $^2\text{H}$ NMR of $1\text{k-d}_1$

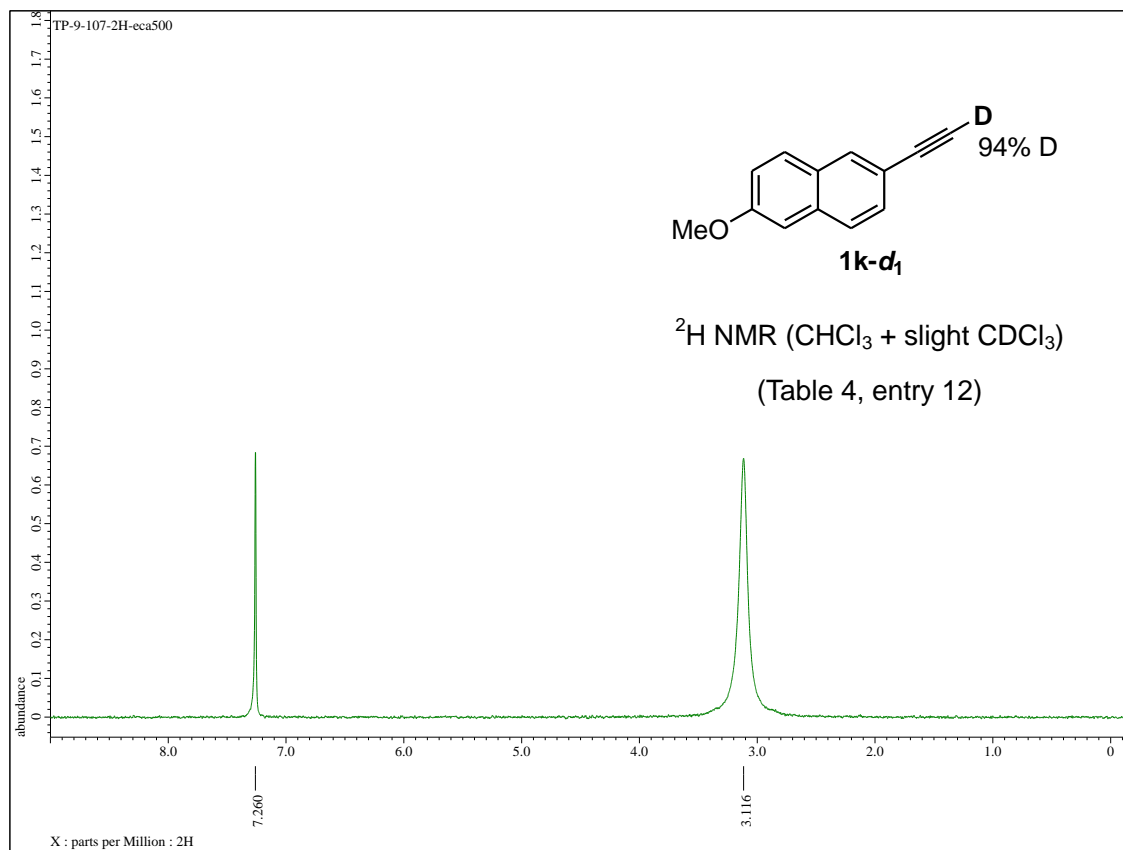

**$^1\text{H}$  NMR of 1l-d<sub>1</sub>**

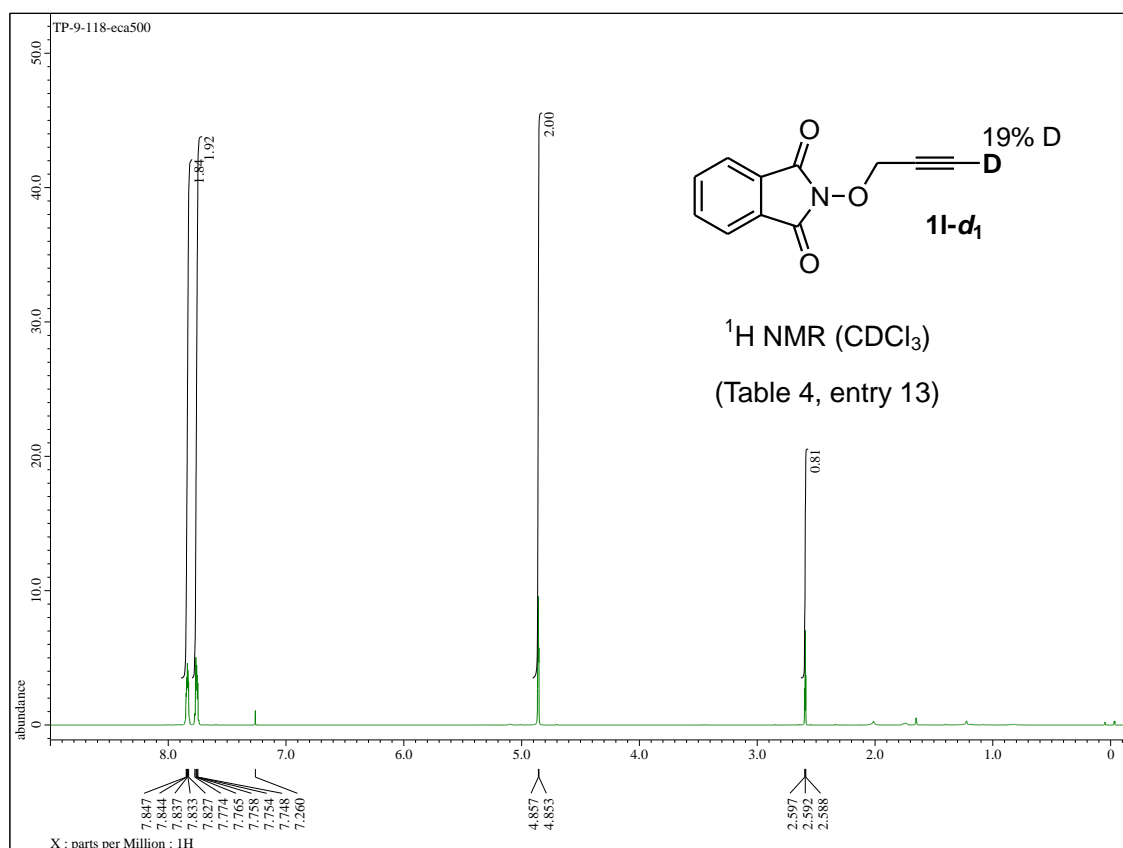

**$^2\text{H}$  NMR of 1l-d<sub>1</sub>**

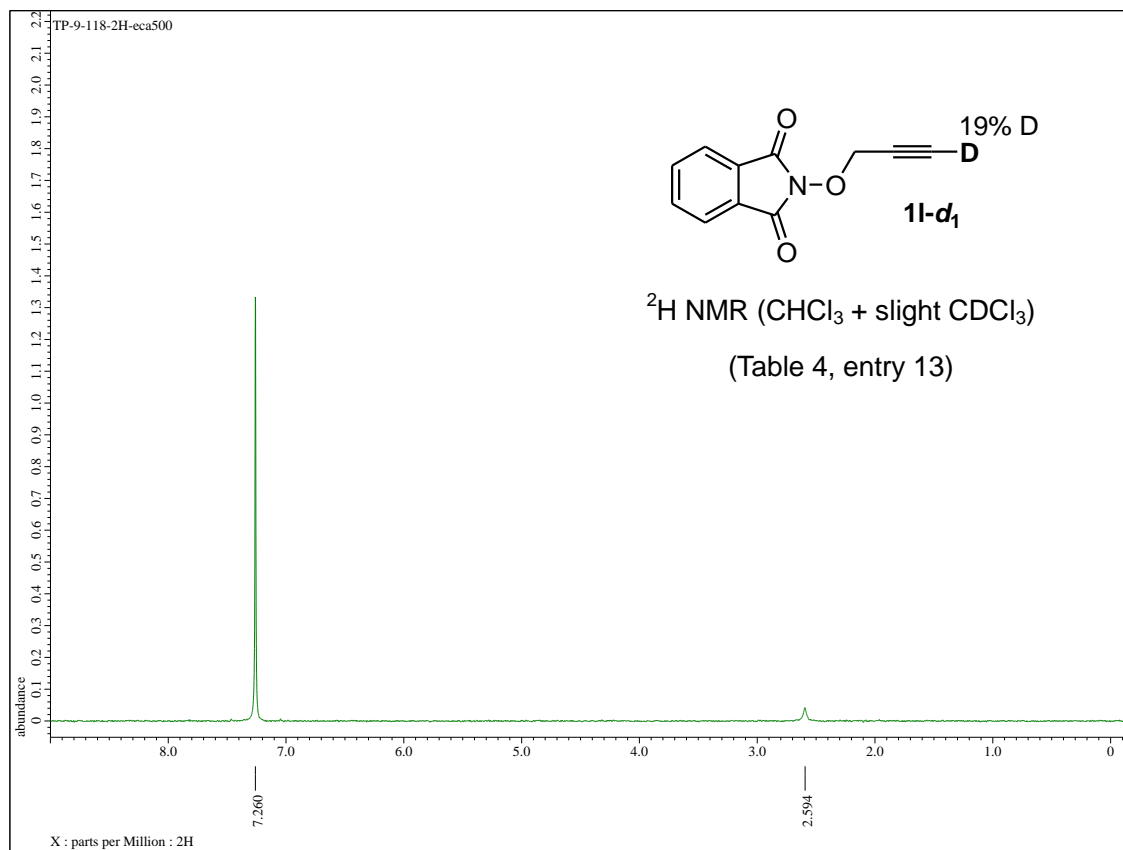

### $^1\text{H}$ NMR of **1l-d<sub>1</sub>**

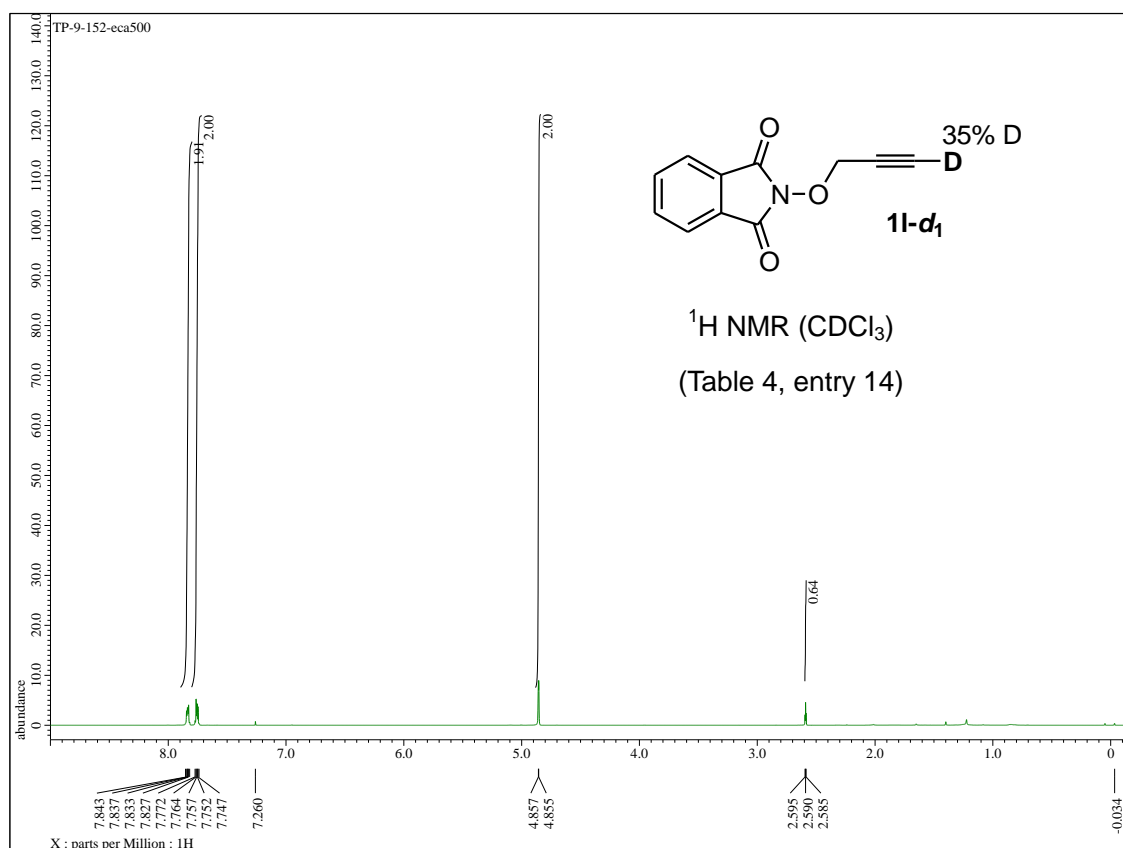

### $^2\text{H}$ NMR of **1l-d<sub>1</sub>**

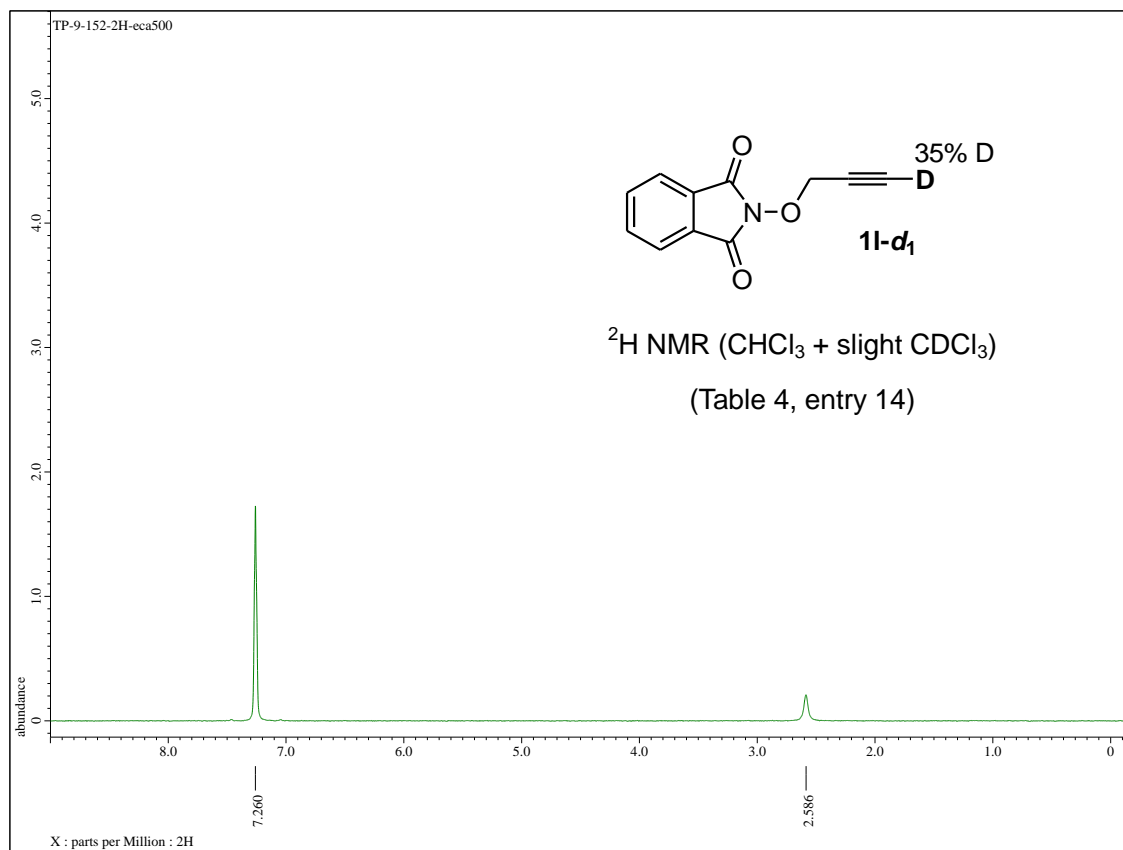

# <sup>1</sup>H NMR of 1m-d<sub>1</sub>

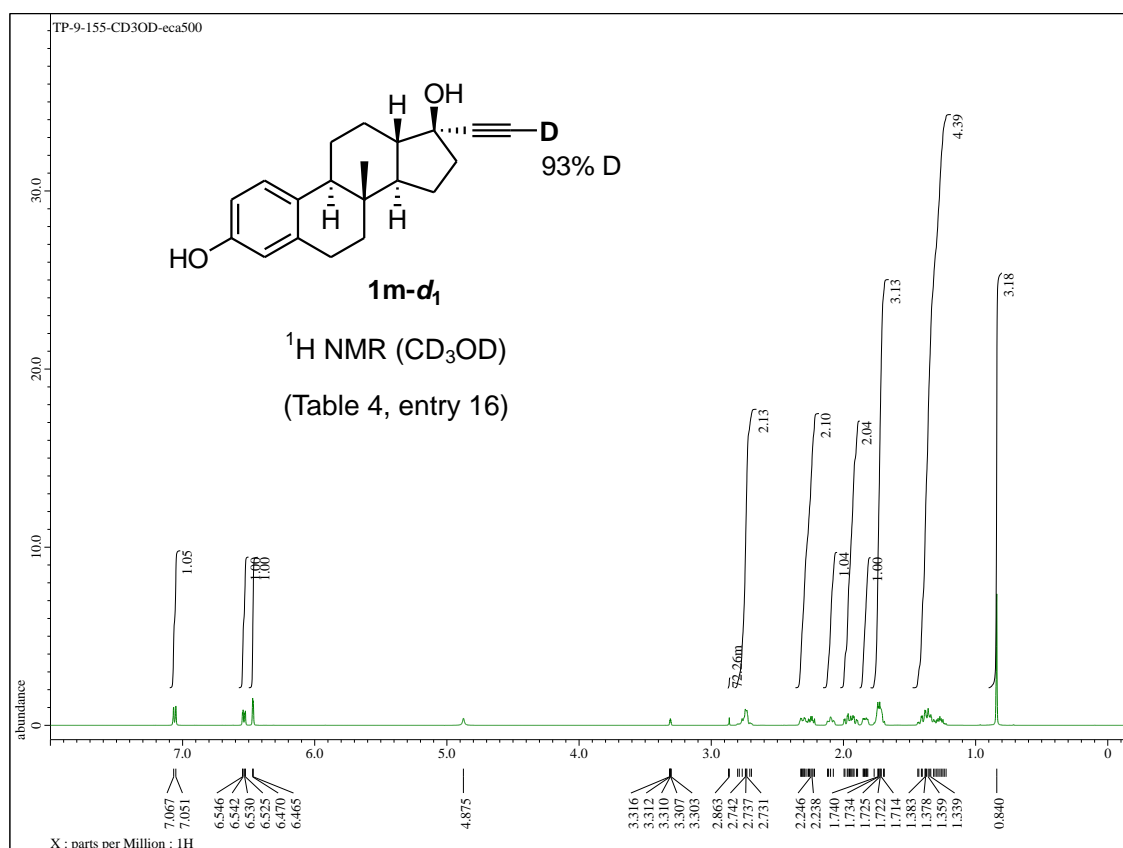

# <sup>2</sup>H NMR of 1m-d<sub>1</sub>

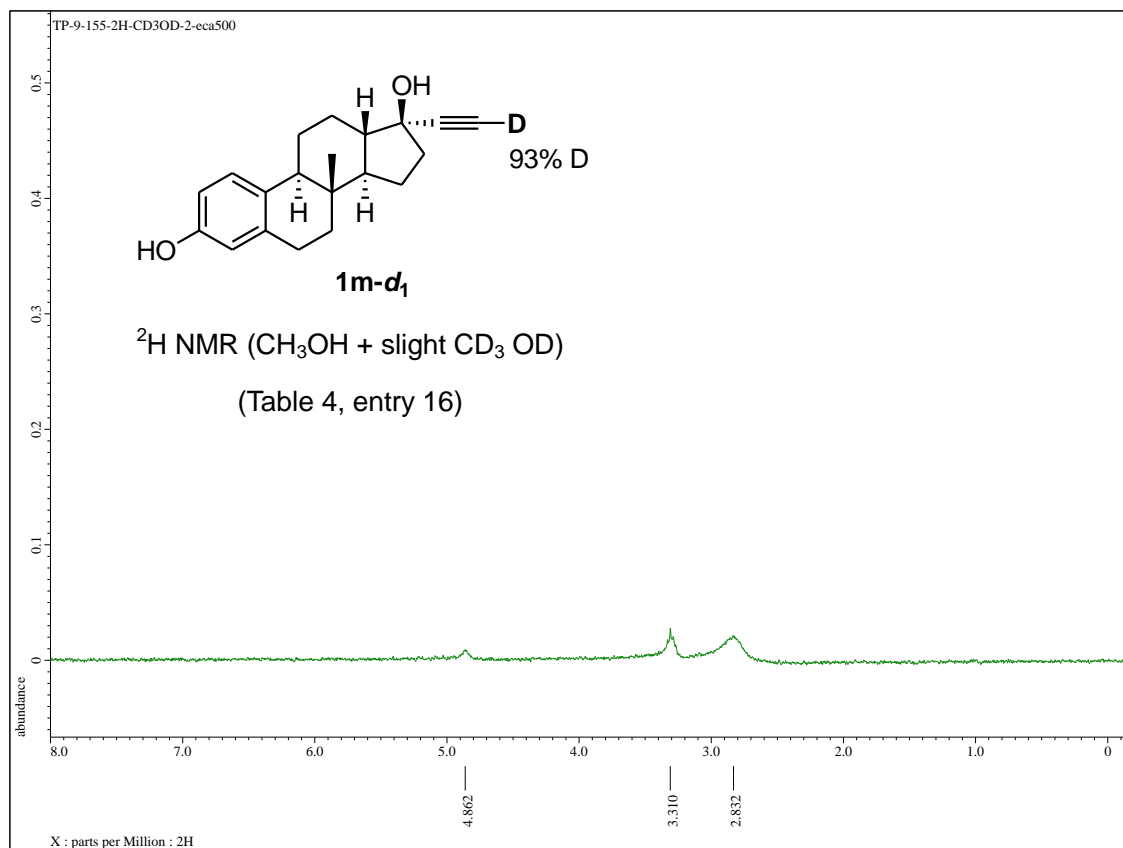

Supplement: c5ra18921g1.pdf [file c5ra18921g1.pdf]
